# Supplementary material
Source: publisher figshare collection journal article supplement (https://acs.figshare.com/ndownloader/files/17662553)
Supplement: Supplementary file 1 [file 17662553]

## Sheet: Lithium ternary oxides
coating	cathode	Ed (eV/atom)	PE
Li3B11O18	LiCoO2	-0.019891	Co3O4, Li3B7O12, Li(CoO2)2
Li3B11O18	Li0.5CoO2	-0.001179	Li3B7O12, CoO2, Co3O4
Li3B11O18	LiNiO2	-0.034226	Li(NiO2)2, Ni3BO5, LiBO2
Li3B11O18	Li0.5NiO2	-0.021206	O2, Ni3BO5, Li3B7O12
Li3B11O18	LMNO	0	--
Li3B11O18	MNO	0	--
Li3B11O18	LiCoPO4	0	--
Li3B11O18	CoPO4	-0.008743	BPO4, CoO2, Co3O4, LiCoPO4
Li3B7O12	LiCoO2	0	--
Li3B7O12	Li0.5CoO2	0	--
Li3B7O12	LiNiO2	-0.018137	LiBO2, Li(NiO2)2, Ni3BO5
Li3B7O12	Li0.5NiO2	0	--
Li3B7O12	LMNO	0	--
Li3B7O12	MNO	-0.001919	O2, Li3B11O18, Li2Mn3NiO8
Li3B7O12	LiCoPO4	0	--
Li3B7O12	CoPO4	-0.008615	CoO2, BPO4, LiCoPO4, Co3O4
Li2B4O7	LiCoO2	0	--
Li2B4O7	Li0.5CoO2	0	--
Li2B4O7	LiNiO2	-0.016487	Ni3BO5, LiBO2, Li(NiO2)2
Li2B4O7	Li0.5NiO2	0	--
Li2B4O7	LMNO	0	--
Li2B4O7	MNO	-0.011107	O2, Li2Mn3NiO8, Li3B7O12
Li2B4O7	LiCoPO4	-0.006073	Li3PO4, Li3B7O12, Co4B6O13
Li2B4O7	CoPO4	-0.012445	Co3O4, BPO4, Li2B3PO8, CoO2
LiBO2	LiCoO2	0	--
LiBO2	Li0.5CoO2	0	--
LiBO2	LiNiO2	-0.002347	Li(NiO2)2, Li6B4O9, NiO
LiBO2	Li0.5NiO2	0	--
LiBO2	LMNO	0	--
LiBO2	MNO	-0.044152	Li3B7O12, O2, Li2Mn3NiO8
LiBO2	LiCoPO4	-0.025465	Li3B7O12, Co4B6O13, Li3PO4
LiBO2	CoPO4	-0.058661	Li3B7O12, Li(CoO2)2, Co3O4, Li3PO4
Li6B4O9	LiCoO2	0	--
Li6B4O9	Li0.5CoO2	0	--
Li6B4O9	LiNiO2	0	--
Li6B4O9	Li0.5NiO2	0	--
Li6B4O9	LMNO	-0.004662	LiBO2, Li2MnO3, NiO
Li6B4O9	MNO	-0.062075	Li3B7O12, O2, Li2Mn3NiO8
Li6B4O9	LiCoPO4	-0.039189	Li3PO4, CoO, Co4B6O13
Li6B4O9	CoPO4	-0.094207	Co3O4, Li(CoO2)2, Li3B7O12, Li3PO4
Li3BO3	LiCoO2	0	--
Li3BO3	Li0.5CoO2	-0.004717	Li6B4O9, Li5Co3O8, Li7Co5O12
Li3BO3	LiNiO2	0	--
Li3BO3	Li0.5NiO2	-0.003165	Li2NiO3, Li6B4O9, NiO
Li3BO3	LMNO	-0.014948	Li2MnO3, NiO, LiBO2
Li3BO3	MNO	-0.08381	Li3B7O12, O2, Li2Mn3NiO8
Li3BO3	LiCoPO4	-0.057845	Co4B6O13, Li3PO4, CoO
Li3BO3	CoPO4	-0.147404	Co3O4, Li(CoO2)2, Li3B7O12, Li3PO4
Li2CO3	LiCoO2	0	--
Li2CO3	Li0.5CoO2	0	--
Li2CO3	LiNiO2	0	--
Li2CO3	Li0.5NiO2	0	--
Li2CO3	LMNO	0	--
Li2CO3	MNO	-0.020951	NiCO3, O2, MnO2, Li2Mn3NiO8
Li2CO3	LiCoPO4	-0.003331	CoCO3, Li3PO4
Li2CO3	CoPO4	-0.020127	Li3PO4, CO2, Co3O4, Li(CoO2)2
LiNO3	LiCoO2	0	--
LiNO3	Li0.5CoO2	0	--
LiNO3	LiNiO2	0	--
LiNO3	Li0.5NiO2	0	--
LiNO3	LMNO	0	--
LiNO3	MNO	-0.005528	O2, MnO2, Li2Mn3NiO8, Ni(NO3)2
LiNO3	LiCoPO4	0	--
LiNO3	CoPO4	0	--
LiAl5O8	LiCoO2	0	--
LiAl5O8	Li0.5CoO2	0	--
LiAl5O8	LiNiO2	-0.022058	LiAlO2, Li(NiO2)2, NiO
LiAl5O8	Li0.5NiO2	0	--
LiAl5O8	LMNO	0	--
LiAl5O8	MNO	-0.008593	Li2Mn3NiO8, Al2O3, O2
LiAl5O8	LiCoPO4	-0.009256	AlPO4, Li3PO4, Al2CoO4
LiAl5O8	CoPO4	-0.081837	Li(CoO2)2, Co3O4, AlPO4
LiAlO2	LiCoO2	0	--
LiAlO2	Li0.5CoO2	0	--
LiAlO2	LiNiO2	0	--
LiAlO2	Li0.5NiO2	0	--
LiAlO2	LMNO	0	--
LiAlO2	MNO	-0.050469	LiAl5O8, O2, Li2Mn3NiO8
LiAlO2	LiCoPO4	-0.038158	Li3PO4, Al2CoO4
LiAlO2	CoPO4	-0.097531	Li(CoO2)2, Li3PO4, Co3O4, AlPO4
Li5AlO4	LiCoO2	0	--
Li5AlO4	Li0.5CoO2	-0.055633	Li5Co3O8, Li7Co5O12, LiAlO2
Li5AlO4	LiNiO2	0	--
Li5AlO4	Li0.5NiO2	-0.053521	NiO, LiAlO2, Li2NiO3
Li5AlO4	LMNO	-0.069099	LiAlO2, Li2MnO3, NiO
Li5AlO4	MNO	-0.148281	O2, Li2MnO3, LiAlO2, Li(NiO2)2
Li5AlO4	LiCoPO4	-0.118147	Li3PO4, LiAlO2, CoO
Li5AlO4	CoPO4	-0.238491	Li3PO4, Li(CoO2)2, LiAl5O8, Co3O4
Li2Si2O5	LiCoO2	-0.000442	Co3O4, Li2SiO3, Li(CoO2)2
Li2Si2O5	Li0.5CoO2	0	--
Li2Si2O5	LiNiO2	-0.023612	Li(NiO2)2, Li2SiO3, NiO
Li2Si2O5	Li0.5NiO2	0	--
Li2Si2O5	LMNO	0	--
Li2Si2O5	MNO	-0.045036	O2, SiO2, Li2Mn3NiO8
Li2Si2O5	LiCoPO4	-0.016186	Li2CoSiO4, SiO2, Li3PO4
Li2Si2O5	CoPO4	-0.065807	Co3O4, Li(CoO2)2, SiO2, Li3PO4
Li2SiO3	LiCoO2	0	--
Li2SiO3	Li0.5CoO2	0	--
Li2SiO3	LiNiO2	0	--
Li2SiO3	Li0.5NiO2	0	--
Li2SiO3	LMNO	0	--
Li2SiO3	MNO	-0.054981	SiO2, Li2Mn3NiO8, O2
Li2SiO3	LiCoPO4	-0.025918	Li3PO4, Li2CoSiO4, SiO2
Li2SiO3	CoPO4	-0.090558	SiO2, Li(CoO2)2, Li3PO4, Co3O4
Li4SiO4	LiCoO2	0	--
Li4SiO4	Li0.5CoO2	-0.012618	Li2SiO3, Li5Co3O8, Li7Co5O12
Li4SiO4	LiNiO2	0	--
Li4SiO4	Li0.5NiO2	-0.011034	Li2NiO3, NiO, Li2SiO3
Li4SiO4	LMNO	-0.022717	NiO, Li2MnO3, Li2SiO3
Li4SiO4	MNO	-0.082324	Li2Si2O5, O2, Li2Mn3NiO8
Li4SiO4	LiCoPO4	-0.075547	Li3PO4, Li2CoSiO4
Li4SiO4	CoPO4	-0.150435	SiO2, Co3O4, Li(CoO2)2, Li3PO4
Li8SiO6	LiCoO2	-0.001279	Li4SiO4, Li5CoO4
Li8SiO6	Li0.5CoO2	-0.052302	Li5Co3O8, Li4SiO4, Li7Co5O12
Li8SiO6	LiNiO2	0	--
Li8SiO6	Li0.5NiO2	-0.050554	NiO, Li2NiO3, Li4SiO4
Li8SiO6	LMNO	-0.063446	Li4SiO4, NiO, Li2MnO3
Li8SiO6	MNO	-0.137385	Li(NiO2)2, Li2SiO3, O2, Li2MnO3
Li8SiO6	LiCoPO4	-0.117385	Li2CoSiO4, Li3PO4, CoO
Li8SiO6	CoPO4	-0.226636	Li3PO4, Li2Si2O5, Co3O4, Li(CoO2)2
LiPO3	LiCoO2	-0.071346	Li(CoO2)2, Li3PO4, Co3O4
LiPO3	Li0.5CoO2	-0.018848	CoPO4, Li4P2O7, CoO2
LiPO3	LiNiO2	-0.107784	Ni3O4, O2, Li3PO4
LiPO3	Li0.5NiO2	-0.07965	LiNiPO4, Li3PO4, O2
LiPO3	LMNO	-0.018842	LiNiPO4, MnO2, Li4P2O7
LiPO3	MNO	-0.023242	MnO2, LiNiPO4, O2
LiPO3	LiCoPO4	0	--
LiPO3	CoPO4	-0.004261	LiCoP2O7
Li4P2O7	LiCoO2	-0.041179	Li3PO4, Li(CoO2)2, Co3O4
Li4P2O7	Li0.5CoO2	-0.003292	Li3PO4, LiCoPO4, CoO2
Li4P2O7	LiNiO2	-0.060863	Li3PO4, O2, Ni3O4
Li4P2O7	Li0.5NiO2	-0.031749	O2, Li3PO4, Ni3O4
Li4P2O7	LMNO	-0.004431	Li3PO4, LiNiPO4, MnO2
Li4P2O7	MNO	-0.01304	Li2Mn3NiO8, O2, LiNiPO4, MnO2
Li4P2O7	LiCoPO4	0	--
Li4P2O7	CoPO4	0	--
Li3PO4	LiCoO2	0	--
Li3PO4	Li0.5CoO2	0	--
Li3PO4	LiNiO2	0	--
Li3PO4	Li0.5NiO2	0	--
Li3PO4	LMNO	0	--
Li3PO4	MNO	-0.011465	LiNiPO4, Li2Mn3NiO8, O2, MnO2
Li3PO4	LiCoPO4	0	--
Li3PO4	CoPO4	-0.001133	Li4P2O7, LiCoPO4, CoO2
Li2S2O7	LiCoO2	-0.088694	Li2SO4, Co3O4, CoO2
Li2S2O7	Li0.5CoO2	-0.039417	CoO2, Li2SO4, Li2Co(SO4)2
Li2S2O7	LiNiO2	-0.115389	Ni3O4, Li2SO4, O2
Li2S2O7	Li0.5NiO2	-0.076556	NiSO4, Li2SO4, O2
Li2S2O7	LMNO	-0.043354	NiSO4, Li2SO4, MnO2
Li2S2O7	MNO	-0.032231	O2, MnO2, NiSO4, Li2SO4
Li2S2O7	LiCoPO4	-0.019465	Co(PO3)2, Li2SO4, Li2Co(SO4)2
Li2S2O7	CoPO4	0	--
Li2SO4	LiCoO2	0	--
Li2SO4	Li0.5CoO2	0	--
Li2SO4	LiNiO2	0	--
Li2SO4	Li0.5NiO2	0	--
Li2SO4	LMNO	0	--
Li2SO4	MNO	0	--
Li2SO4	LiCoPO4	0	--
Li2SO4	CoPO4	0	--
LiScO2	LiCoO2	0	--
LiScO2	Li0.5CoO2	-0.004662	Sc2O3, Li7Co5O12, Li5Co3O8
LiScO2	LiNiO2	0	--
LiScO2	Li0.5NiO2	-0.002972	NiO, Li2NiO3, Sc2O3
LiScO2	LMNO	-0.015434	Sc2O3, NiO, Li2MnO3
LiScO2	MNO	-0.0787	Sc2O3, Li2Mn3NiO8, O2
LiScO2	LiCoPO4	-0.054673	CoO, Li3PO4, Sc2O3
LiScO2	CoPO4	-0.132063	Li3Sc2(PO4)3, Li(CoO2)2, Sc2O3, Co3O4
Li4Ti5O12	LiCoO2	0	--
Li4Ti5O12	Li0.5CoO2	0	--
Li4Ti5O12	LiNiO2	-0.02264	Li2TiO3, Li(NiO2)2, NiO
Li4Ti5O12	Li0.5NiO2	0	--
Li4Ti5O12	LMNO	0	--
Li4Ti5O12	MNO	-0.048712	O2, Li2Mn3NiO8, TiO2
Li4Ti5O12	LiCoPO4	-0.028498	TiO2, Ti2CoO5, Li3PO4
Li4Ti5O12	CoPO4	-0.069425	Co3O4, TiO2, Li3PO4, Li(CoO2)2
Li2TiO3	LiCoO2	0	--
Li2TiO3	Li0.5CoO2	0	--
Li2TiO3	LiNiO2	0	--
Li2TiO3	Li0.5NiO2	0	--
Li2TiO3	LMNO	0	--
Li2TiO3	MNO	-0.060997	Li2Mn3NiO8, TiO2, O2
Li2TiO3	LiCoPO4	-0.03259	Li3PO4, TiCoO3
Li2TiO3	CoPO4	-0.101665	Li(CoO2)2, TiO2, Co3O4, Li3PO4
Li4TiO4	LiCoO2	0	--
Li4TiO4	Li0.5CoO2	-0.031846	Li7Co5O12, Li2TiO3, Li5Co3O8
Li4TiO4	LiNiO2	0	--
Li4TiO4	Li0.5NiO2	-0.030262	Li2NiO3, Li2TiO3, NiO
Li4TiO4	LMNO	-0.041945	NiO, Li2TiO3, Li2MnO3
Li4TiO4	MNO	-0.095885	O2, Li2Mn3NiO8, Li2TiO3
Li4TiO4	LiCoPO4	-0.078731	Li2TiO3, Li3PO4, CoO
Li4TiO4	CoPO4	-0.175643	Li(CoO2)2, Li3PO4, Co3O4, TiO2
LiVO3	LiCoO2	-0.029438	Co3O4, Li3VO4, Li(CoO2)2
LiVO3	Li0.5CoO2	0	--
LiVO3	LiNiO2	-0.059428	Li3VO4, O2, Ni3O4
LiVO3	Li0.5NiO2	-0.024723	Li3VO4, V2Ni3O8, O2
LiVO3	LMNO	0	--
LiVO3	MNO	-0.015402	O2, Li2Mn3NiO8, V2O5
LiVO3	LiCoPO4	-0.000773	Li3PO4, V2CoO6
LiVO3	CoPO4	-0.016883	Li3PO4, Co3O4, V2O5, Li(CoO2)2
Li3VO4	LiCoO2	0	--
Li3VO4	Li0.5CoO2	0	--
Li3VO4	LiNiO2	0	--
Li3VO4	Li0.5NiO2	0	--
Li3VO4	LMNO	0	--
Li3VO4	MNO	-0.03002	O2, Li2Mn3NiO8, LiVO3
Li3VO4	LiCoPO4	-0.006766	V2Co3O8, Li3PO4
Li3VO4	CoPO4	-0.044752	Li3PO4, Li(CoO2)2, Co3O4, V2O5
Li2CrO4	LiCoO2	0	--
Li2CrO4	Li0.5CoO2	0	--
Li2CrO4	LiNiO2	0	--
Li2CrO4	Li0.5NiO2	0	--
Li2CrO4	LMNO	0	--
Li2CrO4	MNO	-0.014569	CrNiO4, Li2Mn3NiO8, MnO2, O2
Li2CrO4	LiCoPO4	0	--
Li2CrO4	CoPO4	-0.006325	O2, Li9Cr3P8O29, LiCrP2O7, CoO2
LiFeO2	LiCoO2	0	--
LiFeO2	Li0.5CoO2	0	--
LiFeO2	LiNiO2	0	--
LiFeO2	Li0.5NiO2	-0.00158	Li2NiO3, O2, Fe2NiO4
LiFeO2	LMNO	-0.009695	Fe2O3, Li2MnO3, Fe2NiO4
LiFeO2	MNO	-0.066544	O2, Li2Mn3NiO8, Fe2O3, Fe2NiO4
LiFeO2	LiCoPO4	-0.044669	Li3PO4, Fe2CoO4
LiFeO2	CoPO4	-0.104184	Li(CoO2)2, Co3O4, Li3PO4, Fe2O3
Li5FeO4	LiCoO2	0	--
Li5FeO4	Li0.5CoO2	-0.054956	Li5Co3O8, LiFeO2, Li7Co5O12
Li5FeO4	LiNiO2	0	--
Li5FeO4	Li0.5NiO2	-0.052844	LiFeO2, Li2NiO3, NiO
Li5FeO4	LMNO	-0.068421	LiFeO2, NiO, Li2MnO3
Li5FeO4	MNO	-0.148499	Fe2NiO4, Li(NiO2)2, Li2MnO3, O2
Li5FeO4	LiCoPO4	-0.11747	CoO, LiFeO2, Li3PO4
Li5FeO4	CoPO4	-0.243908	Co3O4, Fe2O3, Li(CoO2)2, Li3PO4
Li2CuO2	LiCoO2	0	--
Li2CuO2	Li0.5CoO2	-0.065914	LiCoO2, LiCuO2
Li2CuO2	LiNiO2	-0.051032	NiO, Li3CuO3
Li2CuO2	Li0.5NiO2	-0.07626	NiO, LiCuO2, Li3CuO3
Li2CuO2	LMNO	-0.054407	NiO, Li2MnO3, CuO
Li2CuO2	MNO	-0.150553	Li2Mn3NiO8, LiCuO2
Li2CuO2	LiCoPO4	-0.111257	Li3PO4, CoCuO2
Li2CuO2	CoPO4	-0.215845	Co3O4, Li(CoO2)2, CuO, Li3PO4
Li10Zn4O9	LiCoO2	0	--
Li10Zn4O9	Li0.5CoO2	-0.059109	Li7Co5O12, ZnO, Li5Co3O8
Li10Zn4O9	LiNiO2	0	--
Li10Zn4O9	Li0.5NiO2	-0.056924	NiO, ZnO, Li2NiO3
Li10Zn4O9	LMNO	-0.073039	Li2MnO3, NiO, ZnO
Li10Zn4O9	MNO	-0.158191	Li2NiO3, Li2MnO3, ZnO
Li10Zn4O9	LiCoPO4	-0.123779	ZnO, CoO, Li3PO4
Li10Zn4O9	CoPO4	-0.254887	Zn5Co19O32, Li3PO4, ZnO, Li(CoO2)2
Li6ZnO4	LiCoO2	0	--
Li6ZnO4	Li0.5CoO2	-0.066513	Li7Co5O12, ZnO, Li5Co3O8
Li6ZnO4	LiNiO2	0	--
Li6ZnO4	Li0.5NiO2	-0.064137	ZnO, Li2NiO3, NiO
Li6ZnO4	LMNO	-0.081661	NiO, Li2MnO3, ZnO
Li6ZnO4	MNO	-0.183908	ZnO, Li2NiO3, Li2MnO3
Li6ZnO4	LiCoPO4	-0.136841	Li3PO4, CoO, ZnO
Li6ZnO4	CoPO4	-0.289721	ZnO, Li3PO4, Li(CoO2)2, Zn5Co19O32
LiGa5O8	LiCoO2	-0.008754	Co3O4, Li(CoO2)2, LiGaO2
LiGa5O8	Li0.5CoO2	0	--
LiGa5O8	LiNiO2	-0.034414	LiGaO2, Li(NiO2)2, Ni3O4
LiGa5O8	Li0.5NiO2	-0.012851	Ga2NiO4, O2, LiGaO2
LiGa5O8	LMNO	0	--
LiGa5O8	MNO	-0.011138	O2, Li2Mn3NiO8, Ga2O3
LiGa5O8	LiCoPO4	0	--
LiGa5O8	CoPO4	-0.051369	Li(CoO2)2, GaPO4, Co3O4, Li3PO4
LiGaO2	LiCoO2	0	--
LiGaO2	Li0.5CoO2	0	--
LiGaO2	LiNiO2	0	--
LiGaO2	Li0.5NiO2	0	--
LiGaO2	LMNO	0	--
LiGaO2	MNO	-0.040598	LiGa5O8, O2, Li2Mn3NiO8
LiGaO2	LiCoPO4	-0.021778	Li3PO4, Ga2CoO4
LiGaO2	CoPO4	-0.066663	GaPO4, Li(CoO2)2, Li3PO4, Co3O4
Li5GaO4	LiCoO2	0	--
Li5GaO4	Li0.5CoO2	-0.054863	Li5Co3O8, Li7Co5O12, LiGaO2
Li5GaO4	LiNiO2	0	--
Li5GaO4	Li0.5NiO2	-0.052751	LiGaO2, Li2NiO3, NiO
Li5GaO4	LMNO	-0.068328	NiO, LiGaO2, Li2MnO3
Li5GaO4	MNO	-0.147218	Li(NiO2)2, O2, Li2MnO3, LiGaO2
Li5GaO4	LiCoPO4	-0.117377	CoO, Li3PO4, LiGaO2
Li5GaO4	CoPO4	-0.234938	Li3PO4, Co3O4, LiGaO2, Li(CoO2)2
Li2Ge7O15	LiCoO2	-0.01565	Li2GeO3, Li(CoO2)2, Co3O4
Li2Ge7O15	Li0.5CoO2	0	--
Li2Ge7O15	LiNiO2	-0.06539	Li2NiGe3O8, O2, Ni2GeO4
Li2Ge7O15	Li0.5NiO2	-0.047398	O2, Ni2GeO4, Li2NiGe3O8
Li2Ge7O15	LMNO	0	--
Li2Ge7O15	MNO	-0.015436	GeO2, Li2Mn3NiO8, O2
Li2Ge7O15	LiCoPO4	-0.00237	Li3PO4, Li2CoGe3O8, GeO2
Li2Ge7O15	CoPO4	-0.01618	Li(CoO2)2, GeO2, Li3PO4, Co3O4
Li4Ge5O12	LiCoO2	-0.01242	Li2GeO3, Li(CoO2)2, Co3O4
Li4Ge5O12	Li0.5CoO2	0	--
Li4Ge5O12	LiNiO2	-0.042004	Li2GeO3, Li2NiGe3O8, O2
Li4Ge5O12	Li0.5NiO2	-0.034406	Li2NiGe3O8, Li2GeO3, O2
Li4Ge5O12	LMNO	-0.00408	Li2NiGe3O8, Li4Mn5O12
Li4Ge5O12	MNO	-0.031801	O2, Li2Mn3NiO8, GeO2
Li4Ge5O12	LiCoPO4	-0.01607	GeO2, Li3PO4, Li2CoGe3O8
Li4Ge5O12	CoPO4	-0.042723	Li(CoO2)2, Li3PO4, Co3O4, GeO2
Li2GeO3	LiCoO2	0	--
Li2GeO3	Li0.5CoO2	0	--
Li2GeO3	LiNiO2	0	--
Li2GeO3	Li0.5NiO2	0	--
Li2GeO3	LMNO	0	--
Li2GeO3	MNO	-0.043594	O2, GeO2, Li2Mn3NiO8
Li2GeO3	LiCoPO4	-0.023102	Li2CoGe3O8, Li2CoGeO4, Li3PO4
Li2GeO3	CoPO4	-0.069537	Li(CoO2)2, GeO2, Co3O4, Li3PO4
Li4GeO4	LiCoO2	0	--
Li4GeO4	Li0.5CoO2	-0.014586	Li7Co5O12, Li5Co3O8, Li2GeO3
Li4GeO4	LiNiO2	0	--
Li4GeO4	Li0.5NiO2	-0.013002	Li2GeO3, Li2NiO3, NiO
Li4GeO4	LMNO	-0.024685	Li2GeO3, Li2MnO3, NiO
Li4GeO4	MNO	-0.082735	O2, Li2GeO3, Li2Mn3NiO8
Li4GeO4	LiCoPO4	-0.077644	Li2CoGeO4, Li3PO4
Li4GeO4	CoPO4	-0.140599	Co3O4, Li2Ge7O15, Li3PO4, Li(CoO2)2
LiAsO3	LiCoO2	-0.05184	Li3AsO4, Co3O4, Li(CoO2)2
LiAsO3	Li0.5CoO2	0	--
LiAsO3	LiNiO2	-0.085277	Ni3O4, Li3AsO4, O2
LiAsO3	Li0.5NiO2	-0.044289	Ni3(AsO4)2, O2, Li3AsO4
LiAsO3	LMNO	0	--
LiAsO3	MNO	-0.011633	O2, Ni(AsO3)2, MnO2, Li2Mn3NiO8
LiAsO3	LiCoPO4	0	--
LiAsO3	CoPO4	0	--
Li3AsO4	LiCoO2	0	--
Li3AsO4	Li0.5CoO2	0	--
Li3AsO4	LiNiO2	0	--
Li3AsO4	Li0.5NiO2	0	--
Li3AsO4	LMNO	0	--
Li3AsO4	MNO	-0.014441	Li2Mn3NiO8, Ni(AsO3)2, O2, MnO2
Li3AsO4	LiCoPO4	0	--
Li3AsO4	CoPO4	-0.013566	Li3PO4, CoO2, LiCoPO4, LiAsO3
Li2SeO4	LiCoO2	0	--
Li2SeO4	Li0.5CoO2	0	--
Li2SeO4	LiNiO2	0	--
Li2SeO4	Li0.5NiO2	0	--
Li2SeO4	LMNO	0	--
Li2SeO4	MNO	-0.001686	NiSeO4, Li2Mn3NiO8, O2, MnO2
Li2SeO4	LiCoPO4	0	--
Li2SeO4	CoPO4	0	--
Li4SeO5	LiCoO2	0	--
Li4SeO5	Li0.5CoO2	-0.025132	Li7Co5O12, Li2SeO4, Li5Co3O8
Li4SeO5	LiNiO2	0	--
Li4SeO5	Li0.5NiO2	-0.023641	Li2NiO3, NiO, Li2SeO4
Li4SeO5	LMNO	-0.034637	Li2SeO4, NiO, Li2MnO3
Li4SeO5	MNO	-0.087787	Li2Mn3NiO8, O2, Li2SeO4
Li4SeO5	LiCoPO4	-0.076128	Li2SeO4, Li2Co3(SeO3)4, Li3PO4, Co3O4
Li4SeO5	CoPO4	-0.132698	Li2SeO4, Li(CoO2)2, Co3O4, Li3PO4
LiYO2	LiCoO2	-0.002738	Li5CoO4, Y2O3
LiYO2	Li0.5CoO2	-0.051574	Y2O3, Li7Co5O12, Li5Co3O8
LiYO2	LiNiO2	0	--
LiYO2	Li0.5NiO2	-0.049885	Li2NiO3, NiO, Y2O3
LiYO2	LMNO	-0.062347	Li2MnO3, NiO, Y2O3
LiYO2	MNO	-0.119302	Li(NiO2)2, Li2MnO3, Y2O3, O2
LiYO2	LiCoPO4	-0.101585	Li3PO4, Y2O3, CoO
LiYO2	CoPO4	-0.226778	YPO4, Co3O4, Li3PO4, Li(CoO2)2
Li2ZrO3	LiCoO2	0	--
Li2ZrO3	Li0.5CoO2	-0.014238	Li5Co3O8, ZrO2, Li7Co5O12
Li2ZrO3	LiNiO2	0	--
Li2ZrO3	Li0.5NiO2	-0.012289	NiO, Li2NiO3, ZrO2
Li2ZrO3	LMNO	-0.026668	NiO, ZrO2, Li2MnO3
Li2ZrO3	MNO	-0.093842	ZrO2, Li2Mn3NiO8, O2
Li2ZrO3	LiCoPO4	-0.071944	Li3PO4, ZrO2, CoO
Li2ZrO3	CoPO4	-0.162302	Co3O4, Li3PO4, Li(CoO2)2, ZrO2
Li6Zr2O7	LiCoO2	0	--
Li6Zr2O7	Li0.5CoO2	-0.023891	Li7Co5O12, Li5Co3O8, ZrO2
Li6Zr2O7	LiNiO2	0	--
Li6Zr2O7	Li0.5NiO2	-0.021779	Li2NiO3, ZrO2, NiO
Li6Zr2O7	LMNO	-0.037356	ZrO2, Li2MnO3, NiO
Li6Zr2O7	MNO	-0.105339	O2, ZrO2, Li2Mn3NiO8
Li6Zr2O7	LiCoPO4	-0.086405	CoO, Li3PO4, ZrO2
Li6Zr2O7	CoPO4	-0.192462	ZrO2, Li(CoO2)2, Li3PO4, Co3O4
LiNbO3	LiCoO2	0	--
LiNbO3	Li0.5CoO2	0	--
LiNbO3	LiNiO2	-0.016615	Li(NiO2)2, Li3NbO4, NiO
LiNbO3	Li0.5NiO2	0	--
LiNbO3	LMNO	0	--
LiNbO3	MNO	-0.045429	O2, Nb2O5, Li2Mn3NiO8
LiNbO3	LiCoPO4	-0.015339	Nb2CoO6, Li3PO4
LiNbO3	CoPO4	-0.064926	Li(CoO2)2, Li3PO4, Nb2O5, Co3O4
Li3NbO4	LiCoO2	0	--
Li3NbO4	Li0.5CoO2	0	--
Li3NbO4	LiNiO2	0	--
Li3NbO4	Li0.5NiO2	0	--
Li3NbO4	LMNO	0	--
Li3NbO4	MNO	-0.06718	Li2Mn3NiO8, O2, Nb2O5
Li3NbO4	LiCoPO4	-0.033699	Li3PO4, CoO, Nb2CoO6
Li3NbO4	CoPO4	-0.116448	Nb2O5, Li3PO4, Li(CoO2)2, Co3O4
Li8Nb2O9	LiCoO2	0	--
Li8Nb2O9	Li0.5CoO2	-0.020511	Li7Co5O12, Li5Co3O8, Li3NbO4
Li8Nb2O9	LiNiO2	0	--
Li8Nb2O9	Li0.5NiO2	-0.019536	NiO, Li3NbO4, Li2NiO3
Li8Nb2O9	LMNO	-0.026726	NiO, Li2MnO3, Li3NbO4
Li8Nb2O9	MNO	-0.082548	O2, Nb2O5, Li2Mn3NiO8
Li8Nb2O9	LiCoPO4	-0.05703	CoO, Li3PO4, LiNbCoO4
Li8Nb2O9	CoPO4	-0.141876	LiNb3O8, Co3O4, Li3PO4, Li(CoO2)2
Li2MoO4	LiCoO2	0	--
Li2MoO4	Li0.5CoO2	0	--
Li2MoO4	LiNiO2	0	--
Li2MoO4	Li0.5NiO2	0	--
Li2MoO4	LMNO	0	--
Li2MoO4	MNO	-0.014372	O2, MoO3, Li2Mn3NiO8
Li2MoO4	LiCoPO4	0	--
Li2MoO4	CoPO4	-0.015474	Li(CoO2)2, MoO3, Li3PO4, Co3O4
Li4MoO5	LiCoO2	0	--
Li4MoO5	Li0.5CoO2	-0.016247	Li7Co5O12, Li5Co3O8, Li2MoO4
Li4MoO5	LiNiO2	0	--
Li4MoO5	Li0.5NiO2	-0.014756	Li2MoO4, NiO, Li2NiO3
Li4MoO5	LMNO	-0.025752	Li2MoO4, NiO, Li2MnO3
Li4MoO5	MNO	-0.080921	Li2MoO4, O2, Li2Mn3NiO8
Li4MoO5	LiCoPO4	-0.060375	Li3PO4, Li2MoO4, CoO
Li4MoO5	CoPO4	-0.121713	Co3O4, Li2MoO4, Li3PO4, Li(CoO2)2
LiInO2	LiCoO2	0	--
LiInO2	Li0.5CoO2	-0.030895	Li5Co3O8, In2O3, Li7Co5O12
LiInO2	LiNiO2	0	--
LiInO2	Li0.5NiO2	-0.029205	NiO, Li2NiO3, In2O3
LiInO2	LMNO	-0.041667	NiO, In2O3, Li2MnO3
LiInO2	MNO	-0.098374	O2, Li2Mn3NiO8, In2O3
LiInO2	LiCoPO4	-0.080906	Li3PO4, CoO, In2O3
LiInO2	CoPO4	-0.158363	Li3PO4, Li(CoO2)2, In2O3, Co3O4
Li2SnO3	LiCoO2	0	--
Li2SnO3	Li0.5CoO2	0	--
Li2SnO3	LiNiO2	0	--
Li2SnO3	Li0.5NiO2	0	--
Li2SnO3	LMNO	-0.008996	Li2MnO3, NiO, SnO2
Li2SnO3	MNO	-0.081079	Li2Mn3NiO8, SnO2, O2
Li2SnO3	LiCoPO4	-0.058098	SnO2, Co2SnO4, Li3PO4
Li2SnO3	CoPO4	-0.13874	Li3PO4, SnO2, Li(CoO2)2, Co3O4
Li8SnO6	LiCoO2	0	--
Li8SnO6	Li0.5CoO2	-0.059717	Li7Co5O12, Li5Co3O8, Li2SnO3
Li8SnO6	LiNiO2	0	--
Li8SnO6	Li0.5NiO2	-0.057605	NiO, Li2SnO3, Li2NiO3
Li8SnO6	LMNO	-0.073182	NiO, Li2SnO3, Li2MnO3
Li8SnO6	MNO	-0.154501	SnO2, Li2MnO3, Li2NiO3
Li8SnO6	LiCoPO4	-0.122231	Li2SnO3, Li3PO4, CoO
Li8SnO6	CoPO4	-0.257273	SnO2, LiCoO2, Li3PO4
LiSb3O8	LiCoO2	-0.046561	LiSbO3, Li2Co3SbO8
LiSb3O8	Li0.5CoO2	-0.006533	Co(SbO3)2, LiSbO3, O2
LiSb3O8	LiNiO2	-0.06605	LiSbO3, LiNiSbO4, O2
LiSb3O8	Li0.5NiO2	-0.049231	O2, LiSbO3, Ni(SbO3)2
LiSb3O8	LMNO	-0.009551	LiSbO3, MnO2, Ni(SbO3)2
LiSb3O8	MNO	-0.027968	Ni(SbO3)2, O2, Li2Mn3NiO8, MnO2
LiSb3O8	LiCoPO4	-0.014521	SbPO5, Li4P2O7, Co(SbO3)2
LiSb3O8	CoPO4	-0.010049	Co(SbO3)2, O2, SbPO5, Li4P2O7
LiSbO3	LiCoO2	0	--
LiSbO3	Li0.5CoO2	0	--
LiSbO3	LiNiO2	-0.022188	Li3Ni2SbO6, O2
LiSbO3	Li0.5NiO2	-0.001614	LiNiSbO4, Li3Ni2SbO6, O2
LiSbO3	LMNO	0	--
LiSbO3	MNO	-0.024276	Li2Mn3NiO8, Ni(SbO3)2, MnO2, O2
LiSbO3	LiCoPO4	-0.019352	Co(SbO3)2, Li3PO4
LiSbO3	CoPO4	-0.018896	O2, Co(SbO3)2, Li4P2O7
Li3SbO4	LiCoO2	0	--
Li3SbO4	Li0.5CoO2	0	--
Li3SbO4	LiNiO2	-0.016332	Li3Ni2SbO6, Li2NiO3
Li3SbO4	Li0.5NiO2	-0.00227	Li2NiO3, Li3Ni2SbO6, O2
Li3SbO4	LMNO	-0.007293	LiSbO3, Li2MnO3, Li3Ni2SbO6
Li3SbO4	MNO	-0.068424	LiSbO3, O2, Li2Mn3NiO8
Li3SbO4	LiCoPO4	-0.050836	LiCoSbO4, Li3PO4
Li3SbO4	CoPO4	-0.110836	Li2Co3SbO8, Li3PO4, LiSbO3
Li5SbO5	LiCoO2	0	--
Li5SbO5	Li0.5CoO2	-0.028518	Li7Co5O12, Li3SbO4, Li5Co3O8
Li5SbO5	LiNiO2	-0.004037	Li2O, Li2NiO3, Li3Ni2SbO6
Li5SbO5	Li0.5NiO2	-0.032554	Li3Ni2SbO6, Li2NiO3, Li3SbO4
Li5SbO5	LMNO	-0.042939	Li3SbO4, Li3Ni2SbO6, Li2MnO3
Li5SbO5	MNO	-0.096739	O2, LiSbO3, Li2Mn3NiO8
Li5SbO5	LiCoPO4	-0.081041	Li3PO4, LiCoSbO4, CoO
Li5SbO5	CoPO4	-0.17694	Li2Co3SbO8, LiSbO3, Li3PO4
Li2TeO4	LiCoO2	0	--
Li2TeO4	Li0.5CoO2	0	--
Li2TeO4	LiNiO2	-0.028858	Li(NiO2)2, Li4TeO5, Li2Ni3TeO8
Li2TeO4	Li0.5NiO2	-0.013393	O2, Li4TeO5, Li2Ni3TeO8
Li2TeO4	LMNO	0	--
Li2TeO4	MNO	-0.013589	MnO2, Li2Mn3NiO8, O2, Ni3TeO6
Li2TeO4	LiCoPO4	-0.017562	Li3PO4, CoTeO4
Li2TeO4	CoPO4	-0.016863	CoTeO4, O2, Li4P2O7
Li4TeO5	LiCoO2	0	--
Li4TeO5	Li0.5CoO2	0	--
Li4TeO5	LiNiO2	0	--
Li4TeO5	Li0.5NiO2	0	--
Li4TeO5	LMNO	0	--
Li4TeO5	MNO	-0.049594	O2, Li2TeO4, Li2Mn3NiO8
Li4TeO5	LiCoPO4	-0.03375	CoTeO4, Li3PO4, Co3TeO6
Li4TeO5	CoPO4	-0.072864	Li2TeO4, Li3PO4, Li(CoO2)2, CoTeO4
Li6TeO6	LiCoO2	0	--
Li6TeO6	Li0.5CoO2	-0.01573	Li7Co5O12, Li4TeO5, Li5Co3O8
Li6TeO6	LiNiO2	0	--
Li6TeO6	Li0.5NiO2	-0.014463	Li2NiO3, NiO, Li4TeO5
Li6TeO6	LMNO	-0.02381	NiO, Li4TeO5, Li2MnO3
Li6TeO6	MNO	-0.078642	O2, Li2TeO4, Li2Mn3NiO8
Li6TeO6	LiCoPO4	-0.067633	Li3PO4, Li4CoTeO6
Li6TeO6	CoPO4	-0.131527	Li3PO4, Li(CoO2)2, Li2TeO4, Co3O4
LiTa3O8	LiCoO2	-0.019166	Li(CoO2)2, LiTaO3, Co3O4
LiTa3O8	Li0.5CoO2	0	--
LiTa3O8	LiNiO2	-0.038995	Ni3O4, Li(NiO2)2, LiTaO3
LiTa3O8	Li0.5NiO2	-0.01276	O2, Ni3O4, LiTaO3
LiTa3O8	LMNO	0	--
LiTa3O8	MNO	-0.011897	O2, Li2Mn3NiO8, Ta2O5
LiTa3O8	LiCoPO4	-0.00602	Ta2CoO6, Ta9PO25, Li3PO4
LiTa3O8	CoPO4	-0.067196	Li(CoO2)2, Li3PO4, Co3O4, TaPO5
LiTaO3	LiCoO2	0	--
LiTaO3	Li0.5CoO2	0	--
LiTaO3	LiNiO2	-0.012693	Li3TaO4, NiO, Li(NiO2)2
LiTaO3	Li0.5NiO2	0	--
LiTaO3	LMNO	0	--
LiTaO3	MNO	-0.025286	O2, Ta2O5, Li2Mn3NiO8
LiTaO3	LiCoPO4	-0.007773	Ta2CoO6, Li3PO4
LiTaO3	CoPO4	-0.068797	TaPO5, Li3PO4, Co3O4, Li(CoO2)2
Li3TaO4	LiCoO2	0	--
Li3TaO4	Li0.5CoO2	0	--
Li3TaO4	LiNiO2	0	--
Li3TaO4	Li0.5NiO2	0	--
Li3TaO4	LMNO	0	--
Li3TaO4	MNO	-0.065681	LiTaO3, O2, Li2Mn3NiO8
Li3TaO4	LiCoPO4	-0.037315	Li3PO4, LiTaO3, CoO
Li3TaO4	CoPO4	-0.108945	Li3PO4, Ta9PO25, Li(CoO2)2, Co3O4
Li5TaO5	LiCoO2	0	--
Li5TaO5	Li0.5CoO2	-0.033349	Li7Co5O12, Li3TaO4, Li5Co3O8
Li5TaO5	LiNiO2	0	--
Li5TaO5	Li0.5NiO2	-0.031941	Li2NiO3, NiO, Li3TaO4
Li5TaO5	LMNO	-0.042326	NiO, Li3TaO4, Li2MnO3
Li5TaO5	MNO	-0.097656	Li2Mn3NiO8, O2, LiTaO3
Li5TaO5	LiCoPO4	-0.076407	CoO, LiTaO3, Li3PO4
Li5TaO5	CoPO4	-0.173219	Li3PO4, Li(CoO2)2, LiTaO3, Co3O4
Li2WO4	LiCoO2	0	--
Li2WO4	Li0.5CoO2	0	--
Li2WO4	LiNiO2	-0.014873	NiO, Li(NiO2)2, Li4WO5
Li2WO4	Li0.5NiO2	0	--
Li2WO4	LMNO	0	--
Li2WO4	MNO	-0.040204	WO3, Li2Mn3NiO8, O2
Li2WO4	LiCoPO4	-0.018098	CoWO4, Li3PO4
Li2WO4	CoPO4	-0.061132	WO3, Co3O4, Li3PO4, Li(CoO2)2
Li4WO5	LiCoO2	0	--
Li4WO5	Li0.5CoO2	0	--
Li4WO5	LiNiO2	0	--
Li4WO5	Li0.5NiO2	0	--
Li4WO5	LMNO	0	--
Li4WO5	MNO	-0.059139	O2, WO3, Li2Mn3NiO8
Li4WO5	LiCoPO4	-0.031096	CoWO4, Li3PO4, CoO
Li4WO5	CoPO4	-0.102702	Li(CoO2)2, Li3PO4, Co3O4, WO3
Li5TlO4	LiCoO2	0	--
Li5TlO4	Li0.5CoO2	-0.056836	Li5Co3O8, Tl2O3, Li7Co5O12
Li5TlO4	LiNiO2	0	--
Li5TlO4	Li0.5NiO2	-0.054532	NiO, Li2NiO3, Tl2O3
Li5TlO4	LMNO	-0.071525	NiO, Li2MnO3, Tl2O3
Li5TlO4	MNO	-0.163111	Tl2O3, Li2MnO3, Li2NiO3
Li5TlO4	LiCoPO4	-0.146869	Tl2O, LiCoO2, Li3PO4, Tl4O3
Li5TlO4	CoPO4	-0.262213	Li3PO4, Tl2O3, LiCoO2
Li2PbO3	LiCoO2	0	--
Li2PbO3	Li0.5CoO2	-0.011895	Li5Co3O8, PbO2, Li7Co5O12
Li2PbO3	LiNiO2	0	--
Li2PbO3	Li0.5NiO2	-0.012191	NiPbO3, PbO2, Li2NiO3
Li2PbO3	LMNO	-0.02657	Li2MnO3, PbO2, NiPbO3
Li2PbO3	MNO	-0.09215	O2, PbO2, Li2Mn3NiO8
Li2PbO3	LiCoPO4	-0.098521	PbO2, Pb3O4, Co3O4, Li3PO4
Li2PbO3	CoPO4	-0.159178	PbO2, Li3PO4, Li(CoO2)2, Co3O4
Li4PbO4	LiCoO2	0	--
Li4PbO4	Li0.5CoO2	-0.027816	Li7Co5O12, Li5Co3O8, Li2PbO3
Li4PbO4	LiNiO2	0	--
Li4PbO4	Li0.5NiO2	-0.026408	NiPbO3, Li2NiO3
Li4PbO4	LMNO	-0.042662	Li2MnO3, NiPbO3
Li4PbO4	MNO	-0.112441	Li(NiO2)2, Li2MnO3, PbO2, O2
Li4PbO4	LiCoPO4	-0.129913	LiCoO2, Li3PO4, Pb3O4
Li4PbO4	CoPO4	-0.205721	PbO2, Li3PO4, Co3O4, Li(CoO2)2
LiBiO2	LiCoO2	0	--
LiBiO2	Li0.5CoO2	-0.048221	Bi4O7, LiCoO2, Li3BiO4
LiBiO2	LiNiO2	-0.043881	NiO, Li3BiO4
LiBiO2	Li0.5NiO2	-0.065977	Li3BiO4, NiO, Bi4O7
LiBiO2	LMNO	-0.042917	NiO, Bi2O3, Li2MnO3
LiBiO2	MNO	-0.129332	Li2Mn3NiO8, Bi4O7, LiBiO3
LiBiO2	LiCoPO4	-0.082155	Bi2O3, CoO, Li3PO4
LiBiO2	CoPO4	-0.171292	Co3O4, Bi4O7, Bi3PO7, Li3PO4
Li3BiO3	LiCoO2	0	--
Li3BiO3	Li0.5CoO2	-0.06757	LiCoO2, Bi2O3, Li3BiO4
Li3BiO3	LiNiO2	-0.034674	NiO, Li5BiO5
Li3BiO3	Li0.5NiO2	-0.080118	Li2NiO3, Li3BiO4, NiO
Li3BiO3	LMNO	-0.063079	Li2MnO3, NiO, Bi2O3
Li3BiO3	MNO	-0.161835	Li2MnO3, Bi4O7, NiO, LiBiO3
Li3BiO3	LiCoPO4	-0.113529	Li3PO4, CoO, Bi2O3
Li3BiO3	CoPO4	-0.237062	Li3PO4, Bi2O3, Bi4O7, Co3O4

## Sheet: Binary oxides
coating	cathode	Ed (eV/atom)	PE
BeO	LiCoO2	0	--
BeO	Li0.5CoO2	0	--
BeO	LiNiO2	0	--
BeO	Li0.5NiO2	0	--
BeO	LMNO	0	--
BeO	MNO	0	--
BeO	LiCoPO4	0	--
BeO	CoPO4	0	--
B2O3	LiCoO2	-0.056755	Co3O4, Li3B7O12, Li(CoO2)2
B2O3	Li0.5CoO2	-0.015967	CoO2, CoB4O7, Li3B11O18
B2O3	LiNiO2	-0.085942	O2, Li3B7O12, Ni3BO5
B2O3	Li0.5NiO2	-0.058113	Ni3BO5, O2, Li3B7O12
B2O3	LMNO	-0.010899	MnO2, Li3B11O18, MnNiO3
B2O3	MNO	0	--
B2O3	LiCoPO4	-0.016455	BPO4, CoB4O7, Li3B11O18
B2O3	CoPO4	-0.016315	Co3O4, BPO4, CoO2
Li2O	LiCoO2	-0.01001	Li5CoO4
Li2O	Li0.5CoO2	-0.079628	Li7Co5O12, Li5Co3O8
Li2O	LiNiO2	0	--
Li2O	Li0.5NiO2	-0.077094	NiO, Li2NiO3
Li2O	LMNO	-0.095787	NiO, Li2MnO3
Li2O	MNO	-0.218858	Li2MnO3, Li2NiO3
Li2O	LiCoPO4	-0.154645	CoO, Li3PO4
Li2O	CoPO4	-0.334431	Li3PO4, LiCoO2
Na2O	LiCoO2	-0.084645	Na2Li3CoO4, Na3CoO3
Na2O	Li0.5CoO2	-0.165536	Na3CoO3, Na4CoO4, Na2Li3CoO4
Na2O	LiNiO2	-0.056224	NaNiO2, Li2O
Na2O	Li0.5NiO2	-0.119751	NaNiO2, Li2NiO3, Na2O2
Na2O	LMNO	-0.122917	NiO, Li2MnO3, Na2MnO3
Na2O	MNO	-0.262503	Na2MnO3, NaNiO2, Na2O2
Na2O	LiCoPO4	-0.224941	Na3PO4, Co, LiCoO2, Na5Li(PO4)2
Na2O	CoPO4	-0.430878	NaCoO2, Na3PO4
MgO	LiCoO2	0	--
MgO	Li0.5CoO2	0	--
MgO	LiNiO2	-0.00192	Li2NiO3, MgNiO2
MgO	Li0.5NiO2	0	--
MgO	LMNO	-0.009592	MgNiO2, Mg6MnO8, Li2MnO3
MgO	MNO	-0.046804	Ni3O4, MgMnO3, O2
MgO	LiCoPO4	-0.02838	LiMgPO4, CoO
MgO	CoPO4	-0.149204	Mg(CoO2)2, Mg3(PO4)2
Al2O3	LiCoO2	-0.01995	Co3O4, LiAl5O8, Li(CoO2)2
Al2O3	Li0.5CoO2	0	--
Al2O3	LiNiO2	-0.034747	LiAlO2, Ni3O4, Li(NiO2)2
Al2O3	Li0.5NiO2	-0.015598	Ni3O4, O2, LiAl5O8
Al2O3	LMNO	0	--
Al2O3	MNO	0	--
Al2O3	LiCoPO4	-0.013639	Al2CoO4, AlPO4, Li3PO4
Al2O3	CoPO4	-0.082575	Co3O4, AlPO4, CoO2
SiO2	LiCoO2	-0.006013	Co3O4, Li2Si2O5, Li(CoO2)2
SiO2	Li0.5CoO2	0	--
SiO2	LiNiO2	-0.03758	Li(NiO2)2, Ni3O4, Li2SiO3
SiO2	Li0.5NiO2	-0.000315	Ni3O4, Li2Si2O5, O2
SiO2	LMNO	0	--
SiO2	MNO	0	--
SiO2	LiCoPO4	0	--
SiO2	CoPO4	0	--
P2O5	LiCoO2	-0.19443	LiCoP2O7
P2O5	Li0.5CoO2	-0.150139	O2, CoPO4, LiCoP2O7
P2O5	LiNiO2	-0.260807	O2, LiNiPO4
P2O5	Li0.5NiO2	-0.215773	O2, Li2Ni3(P2O7)2, Ni3(PO4)2
P2O5	LMNO	-0.149861	LiMnP2O7, O2, MnP2O7, Ni(PO3)2
P2O5	MNO	-0.143282	O2, Ni(PO3)2, MnP2O7
P2O5	LiCoPO4	-0.08146	LiCo(PO3)3
P2O5	CoPO4	-0.073769	Co(PO3)3
K2O	LiCoO2	-0.116862	K6Co2O7, K2Li3CoO4, K10Co4O9
K2O	Li0.5CoO2	-0.221167	K2Li3CoO4, K6Co2O7, K2CoO2
K2O	LiNiO2	-0.089045	K2O2, K2Li3NiO4, K9Ni2O7
K2O	Li0.5NiO2	-0.145226	K2O2, K2Li3NiO4, K3(NiO2)2
K2O	LMNO	-0.173108	KMnO2, Ni, Li2MnO3, K11LiMn4O16
K2O	MNO	-0.337482	K11Mn4O16, KMnO2, NiO
K2O	LiCoPO4	-0.309189	K3PO4, Li6CoO4, Co, LiCoO2
K2O	CoPO4	-0.521655	K(CoO2)2, K3PO4, Co3O4
CaO	LiCoO2	0	--
CaO	Li0.5CoO2	-0.014466	Ca2Co3O8, LiCoO2
CaO	LiNiO2	0	--
CaO	Li0.5NiO2	0	--
CaO	LMNO	-0.015691	NiO, Ca2Mn3O8, Li2MnO3
CaO	MNO	-0.113352	O2, Ca(NiO2)4, Ca2Mn3O8
CaO	LiCoPO4	-0.094716	CoO, Li3PO4, Ca3(PO4)2
CaO	CoPO4	-0.25513	Ca3(PO4)2, Ca(CoO2)4, Co3O4
Sc2O3	LiCoO2	0	--
Sc2O3	Li0.5CoO2	0	--
Sc2O3	LiNiO2	0	--
Sc2O3	Li0.5NiO2	0	--
Sc2O3	LMNO	0	--
Sc2O3	MNO	-0.00973	O2, MnNiO3, Sc2Mn2O7
Sc2O3	LiCoPO4	0	--
Sc2O3	CoPO4	-0.088531	Co3O4, CoO2, ScPO4
TiO2	LiCoO2	0	--
TiO2	Li0.5CoO2	0	--
TiO2	LiNiO2	-0.029926	Ti4(Ni5O8)3, Li2TiO3, Li(NiO2)2
TiO2	Li0.5NiO2	0	--
TiO2	LMNO	0	--
TiO2	MNO	0	--
TiO2	LiCoPO4	0	--
TiO2	CoPO4	-0.017251	Ti2Co(PO5)2, CoO2
V2O5	LiCoO2	-0.042871	Co3O4, Li3VO4, Li(CoO2)2
V2O5	Li0.5CoO2	0	--
V2O5	LiNiO2	-0.089358	O2, V2Ni3O8, Li3VO4
V2O5	Li0.5NiO2	-0.054549	O2, Li3VO4, V2Ni3O8
V2O5	LMNO	0	--
V2O5	MNO	-0.008129	V2Ni2O7, O2, MnO2
V2O5	LiCoPO4	0	--
V2O5	CoPO4	0	--
Fe2O3	LiCoO2	0	--
Fe2O3	Li0.5CoO2	0	--
Fe2O3	LiNiO2	-0.024444	Fe2NiO4, LiFeO2, O2
Fe2O3	Li0.5NiO2	-0.01696	LiFeO2, Fe2NiO4, O2
Fe2O3	LMNO	0	--
Fe2O3	MNO	-0.007168	O2, Fe2NiO4, MnO2
Fe2O3	LiCoPO4	0	--
Fe2O3	CoPO4	-0.038453	Co3O4, CoO2, FePO4
CuO	LiCoO2	0	--
CuO	Li0.5CoO2	0	--
CuO	LiNiO2	-0.048865	LiCuO2, NiO
CuO	Li0.5NiO2	-0.033059	NiO, LiCuO2, Cu2O3
CuO	LMNO	0	--
CuO	MNO	-0.024995	Cu2O3, MnNiO3, MnO2
CuO	LiCoPO4	0	--
CuO	CoPO4	-0.006628	Co3(PO4)2, Co3O4, Cu2PO5
ZnO	LiCoO2	0	--
ZnO	Li0.5CoO2	0	--
ZnO	LiNiO2	0	--
ZnO	Li0.5NiO2	0	--
ZnO	LMNO	0	--
ZnO	MNO	-0.013978	Zn(NiO2)2, O2, Mn3Zn2O8
ZnO	LiCoPO4	0	--
ZnO	CoPO4	-0.07609	Zn5Co19O32, Zn3(PO4)2, O2
Ga2O3	LiCoO2	-0.017041	LiGa5O8, Co3O4, Li(CoO2)2
Ga2O3	Li0.5CoO2	0	--
Ga2O3	LiNiO2	-0.046001	Ga2NiO4, Li(NiO2)2, LiGaO2
Ga2O3	Li0.5NiO2	-0.027624	Ga2NiO4, O2, LiGaO2
Ga2O3	LMNO	0	--
Ga2O3	MNO	-0.005637	O2, MnO2, Ga2NiO4
Ga2O3	LiCoPO4	0	--
Ga2O3	CoPO4	-0.049834	Co3O4, CoO2, GaPO4
GeO2	LiCoO2	-0.019789	Li2GeO3, Co3O4, Li(CoO2)2
GeO2	Li0.5CoO2	0	--
GeO2	LiNiO2	-0.082143	Ni2GeO4, O2, Li2NiGe3O8
GeO2	Li0.5NiO2	-0.055019	O2, Li2NiGe3O8, Ni2GeO4
GeO2	LMNO	0	--
GeO2	MNO	-0.00524	O2, Ni2GeO4, MnO2
GeO2	LiCoPO4	0	--
GeO2	CoPO4	0	--
As2O5	LiCoO2	-0.089029	LiAsO3, CoO2, Co3O4
As2O5	Li0.5CoO2	-0.04947	LiAsO3, Co(AsO3)2, O2
As2O5	LiNiO2	-0.157496	Ni3(AsO4)2, O2, Li3AsO4
As2O5	Li0.5NiO2	-0.114962	Ni3(AsO4)2, O2, Li3AsO4
As2O5	LMNO	-0.047675	MnO2, Ni(AsO3)2, LiAsO3
As2O5	MNO	-0.045537	MnO2, Ni(AsO3)2, O2
As2O5	LiCoPO4	-0.027104	LiPO3, Co(AsO3)2
As2O5	CoPO4	-0.002927	Co(AsO3)2, Co(PO3)3, O2
Rb2O	LiCoO2	-0.120428	Rb5(CoO2)2, Li2O, Rb6Co2O7
Rb2O	Li0.5CoO2	-0.232713	Li6CoO4, Rb2Co2O3, Rb6Co2O7
Rb2O	LiNiO2	-0.099039	Li2O, Rb2NiO2, Rb2O2
Rb2O	Li0.5NiO2	-0.153698	Rb2O2, Li2O, Rb2NiO2
Rb2O	LMNO	-0.126791	Rb2NiO2, Rb2MnO4, Rb3MnO3, Li2MnO3
Rb2O	MNO	-0.315948	RbMnO2, Rb2MnO4, NiO
Rb2O	LiCoPO4	-0.323933	Co, Li6CoO4, Rb3PO4, LiCoO2
Rb2O	CoPO4	-0.533667	Rb2CoO3, Co3O4, Rb3PO4
SrO	LiCoO2	0	--
SrO	Li0.5CoO2	-0.05324	Sr6(CoO3)5, LiCoO2, Li7Co5O12
SrO	LiNiO2	0	--
SrO	Li0.5NiO2	-0.052927	Sr4(NiO3)3, Li2NiO3
SrO	LMNO	-0.063704	Sr7Mn4O15, NiO, Li2MnO3
SrO	MNO	-0.157773	Sr9(NiO3)7, Sr7Mn4O15, SrO2
SrO	LiCoPO4	-0.143742	Li3PO4, Sr10P6O25, CoO
SrO	CoPO4	-0.328397	Sr3(PO4)2, Co3O4, SrCo6O11
Y2O3	LiCoO2	0	--
Y2O3	Li0.5CoO2	0	--
Y2O3	LiNiO2	0	--
Y2O3	Li0.5NiO2	0	--
Y2O3	LMNO	-0.002778	Y2Mn2O7, Y2MnNiO6, Li2MnO3
Y2O3	MNO	-0.064792	O2, Ni3O4, Y2Mn2O7
Y2O3	LiCoPO4	-0.042438	Li3PO4, YPO4, CoO
Y2O3	CoPO4	-0.179752	Co3O4, CoO2, YPO4
ZrO2	LiCoO2	0	--
ZrO2	Li0.5CoO2	0	--
ZrO2	LiNiO2	0	--
ZrO2	Li0.5NiO2	0	--
ZrO2	LMNO	0	--
ZrO2	MNO	0	--
ZrO2	LiCoPO4	0	--
ZrO2	CoPO4	-0.059545	CoO2, Co3O4, Zr2P2O9
Nb2O5	LiCoO2	-0.002501	Li(CoO2)2, LiNbO3, Co3O4
Nb2O5	Li0.5CoO2	0	--
Nb2O5	LiNiO2	-0.028162	Ni3O4, Li(NiO2)2, LiNbO3
Nb2O5	Li0.5NiO2	0	--
Nb2O5	LMNO	0	--
Nb2O5	MNO	0	--
Nb2O5	LiCoPO4	0	--
Nb2O5	CoPO4	-0.031755	Co3O4, NbPO5, CoO2
MoO3	LiCoO2	-0.054921	Li2MoO4, Co3O4, Li(CoO2)2
MoO3	Li0.5CoO2	0	--
MoO3	LiNiO2	-0.091658	Ni3O4, Li2MoO4, O2
MoO3	Li0.5NiO2	-0.053831	Li2MoO4, NiMoO4, O2
MoO3	LMNO	0	--
MoO3	MNO	-0.009463	NiMoO4, MnO2, O2
MoO3	LiCoPO4	0	--
MoO3	CoPO4	0	--
PdO2	LiCoO2	-0.011605	Li(CoO2)2, Li2PdO3, Co3O4
PdO2	Li0.5CoO2	0	--
PdO2	LiNiO2	-0.045161	Li(NiO2)2, Li2PdO3, Ni3O4
PdO2	Li0.5NiO2	-0.003586	Li2PdO3, O2, Ni3O4
PdO2	LMNO	0	--
PdO2	MNO	0	--
PdO2	LiCoPO4	0	--
PdO2	CoPO4	0	--
CdO	LiCoO2	0	--
CdO	Li0.5CoO2	0	--
CdO	LiNiO2	0	--
CdO	Li0.5NiO2	0	--
CdO	LMNO	0	--
CdO	MNO	-0.056302	Ni3O4, Mn3Cd2O8, O2
CdO	LiCoPO4	-0.008554	CoO, Li3PO4, Cd3(PO4)2
CdO	CoPO4	-0.121297	Cd3(PO4)2, CoO2, Co3O4
In2O3	LiCoO2	0	--
In2O3	Li0.5CoO2	0	--
In2O3	LiNiO2	0	--
In2O3	Li0.5NiO2	0	--
In2O3	LMNO	0	--
In2O3	MNO	-0.00866	O2, Mn2In2O7, MnNiO3
In2O3	LiCoPO4	0	--
In2O3	CoPO4	-0.045817	Co3O4, InPO4, CoO2
SnO2	LiCoO2	0	--
SnO2	Li0.5CoO2	0	--
SnO2	LiNiO2	-0.004666	Li2SnO3, Li(NiO2)2, NiO
SnO2	Li0.5NiO2	0	--
SnO2	LMNO	0	--
SnO2	MNO	0	--
SnO2	LiCoPO4	0	--
SnO2	CoPO4	-0.002506	CoO2, Co3O4, SnP2O7
Sb2O5	LiCoO2	-0.106086	Co(SbO3)2, LiSbO3, O2
Sb2O5	Li0.5CoO2	-0.084907	LiSb3O8, Co(SbO3)2, O2
Sb2O5	LiNiO2	-0.161661	O2, LiSbO3, Ni(SbO3)2
Sb2O5	Li0.5NiO2	-0.145278	LiSbO3, O2, Ni(SbO3)2
Sb2O5	LMNO	-0.074842	MnO2, Ni(SbO3)2, LiSb3O8
Sb2O5	MNO	-0.067856	Ni(SbO3)2, O2, MnO2
Sb2O5	LiCoPO4	-0.075122	LiSb3O8, SbPO5, Co(SbO3)2
Sb2O5	CoPO4	-0.066807	SbPO5, Co(SbO3)2, O2
TeO3	LiCoO2	-0.060695	Li(CoO2)2, Li2TeO4, CoTeO4
TeO3	Li0.5CoO2	-0.008258	CoTeO4, Li2TeO4, O2
TeO3	LiNiO2	-0.122859	O2, Ni3TeO6, Li2TeO4
TeO3	Li0.5NiO2	-0.086368	O2, Li2TeO4, Ni3TeO6
TeO3	LMNO	0	--
TeO3	MNO	-0.013554	Ni3TeO6, O2, MnO2
TeO3	LiCoPO4	-0.001125	LiPO3, CoTeO4
TeO3	CoPO4	0	--
Cs2O	LiCoO2	-0.063414	Co, Cs6Co2O7, Li6CoO4
Cs2O	Li0.5CoO2	-0.195698	LiCoO2, Cs6Co2O7
Cs2O	LiNiO2	-0.060641	Cs2O2, Cs2NiO2, Li2O
Cs2O	Li0.5NiO2	-0.111598	Cs2O2, Li2NiO3, Cs2NiO2
Cs2O	LMNO	-0.128205	Ni, Cs2MnO4, Cs2LiMnO4, Cs4Mn3O6
Cs2O	MNO	-0.275374	Mn3O4, Cs2MnO4, NiO
Cs2O	LiCoPO4	-0.284451	Co, LiCoO2, Cs3PO4, Li6CoO4
Cs2O	CoPO4	-0.487583	Cs3PO4, CsCoO2
BaO	LiCoO2	-0.005561	Li5CoO4, Ba2CoO4, BaCoO2
BaO	Li0.5CoO2	-0.141178	Ba2CoO4, LiCoO2
BaO	LiNiO2	-0.013331	BaNiO3, Li2O, NiO
BaO	Li0.5NiO2	-0.100473	BaNiO3, NiO, Li2NiO3
BaO	LMNO	-0.099736	NiO, Ba4Mn3O10, Li2MnO3
BaO	MNO	-0.247745	Ba6Mn5O16, BaNiO3
BaO	LiCoPO4	-0.186268	CoO, Ba3(PO4)2, Li3PO4
BaO	CoPO4	-0.400884	Co3O4, BaCoO3, Ba3(PO4)2
La2O3	LiCoO2	0	--
La2O3	Li0.5CoO2	0	--
La2O3	LiNiO2	0	--
La2O3	Li0.5NiO2	-0.015065	LaNiO3, O2, Li2NiO3
La2O3	LMNO	-0.012669	La2MnNiO6, Li2MnO3, LaMn2O5, O2
La2O3	MNO	-0.069609	La2MnNiO6, LaMn2O5, O2
La2O3	LiCoPO4	-0.069304	LaPO4, Li3PO4, CoO
La2O3	CoPO4	-0.220842	LaPO4, CoO2, Co3O4
HfO2	LiCoO2	0	--
HfO2	Li0.5CoO2	0	--
HfO2	LiNiO2	0	--
HfO2	Li0.5NiO2	0	--
HfO2	LMNO	0	--
HfO2	MNO	0	--
HfO2	LiCoPO4	0	--
HfO2	CoPO4	-0.063738	CoO2, Hf2P2O9, Co3O4
Ta2O5	LiCoO2	-0.028568	LiTaO3, Li(CoO2)2, Co3O4
Ta2O5	Li0.5CoO2	0	--
Ta2O5	LiNiO2	-0.054444	O2, Ni3O4, LiTaO3
Ta2O5	Li0.5NiO2	-0.023867	Ta2NiO6, O2, LiTaO3
Ta2O5	LMNO	0	--
Ta2O5	MNO	-0.003002	MnO2, Ta2NiO6, O2
Ta2O5	LiCoPO4	-0.011632	Ta2CoO6, Ta9PO25, Li3PO4
Ta2O5	CoPO4	-0.067431	TaPO5, Co3O4, CoO2
WO3	LiCoO2	-0.019863	Co3O4, Li2WO4, Li(CoO2)2
WO3	Li0.5CoO2	0	--
WO3	LiNiO2	-0.051022	Ni3O4, Li2WO4, Li(NiO2)2
WO3	Li0.5NiO2	-0.023575	Li2WO4, O2, NiWO4
WO3	LMNO	0	--
WO3	MNO	-0.001059	O2, MnO2, NiWO4
WO3	LiCoPO4	0	--
WO3	CoPO4	0	--
Tl2O3	LiCoO2	0	--
Tl2O3	Li0.5CoO2	0	--
Tl2O3	LiNiO2	0	--
Tl2O3	Li0.5NiO2	0	--
Tl2O3	LMNO	0	--
Tl2O3	MNO	-0.00486	Mn2Tl2O7, O2, MnNiO3
Tl2O3	LiCoPO4	0	--
Tl2O3	CoPO4	-0.016456	CoO2, Co3O4, TlPO4
PbO2	LiCoO2	0	--
PbO2	Li0.5CoO2	0	--
PbO2	LiNiO2	-0.005307	NiPbO3, Li2NiO3
PbO2	Li0.5NiO2	0	--
PbO2	LMNO	0	--
PbO2	MNO	0	--
PbO2	LiCoPO4	-0.004591	LiPPbO4, CoO2
PbO2	CoPO4	0	--
Bi2O3	LiCoO2	0	--
Bi2O3	Li0.5CoO2	-0.008996	Bi4O7, LiCoO2, Co3O4
Bi2O3	LiNiO2	-0.030989	Li3BiO4, NiO, LiBiO3
Bi2O3	Li0.5NiO2	-0.045291	Bi4O7, NiO, LiBiO3
Bi2O3	LMNO	0	--
Bi2O3	MNO	-0.049812	Mn2BiO5, Bi4O7, MnNiO3
Bi2O3	LiCoPO4	-0.00846	Li3PO4, Bi3PO7, CoO
Bi2O3	CoPO4	-0.107495	CoO2, BiPO4, Co3O4

## Sheet: Quaternary polyanion oxides
coating	cathode	Ed (eV/atom)	PE
Ba2Li3(PO3)7	LiCoO2	-0.071775	Li(CoO2)2, Co3O4, Ba2P2O7, Li3PO4
Ba2Li3(PO3)7	Li0.5CoO2	-0.022466	CoPO4, Ba2P2O7, Li4P2O7, O2
Ba2Li3(PO3)7	LiNiO2	-0.113584	BaNi2(PO4)2, O2, Li3PO4, LiNiPO4
Ba2Li3(PO3)7	Li0.5NiO2	-0.084934	Li3PO4, BaNi2(PO4)2, LiNiPO4, O2
Ba2Li3(PO3)7	LMNO	-0.022982	Li4P2O7, MnO2, BaNiP2O7, Ba2P2O7
Ba2Li3(PO3)7	MNO	-0.025531	O2, LiNiPO4, BaNiP2O7, MnO2
Ba2Li3(PO3)7	LiCoPO4	-0.005219	BaCoP2O7, LiPO3
Ba2Li3(PO3)7	CoPO4	-0.001675	Ba(PO3)2, LiCoP2O7
CsLi(PO3)2	LiCoO2	-0.057699	Li3PO4, Li(CoO2)2, CsCoPO4
CsLi(PO3)2	Li0.5CoO2	-0.00884	CoO2, Li3PO4, CsCoPO4
CsLi(PO3)2	LiNiO2	-0.079247	O2, Cs3PO4, Ni3O4, Li3PO4
CsLi(PO3)2	Li0.5NiO2	-0.042639	Li3PO4, LiNiPO4, CsPO3, O2
CsLi(PO3)2	LMNO	-0.008011	Li3PO4, MnO2, LiNiPO4, CsPO3
CsLi(PO3)2	MNO	-0.014529	CsPO3, O2, LiNiPO4, MnO2
CsLi(PO3)2	LiCoPO4	0	--
CsLi(PO3)2	CoPO4	0	--
LiEu(PO3)4	LiCoO2	-0.079014	Li(CoO2)2, EuPO4, Co3O4, Li3PO4
LiEu(PO3)4	Li0.5CoO2	-0.030894	Li4P2O7, CoPO4, EuPO4, O2
LiEu(PO3)4	LiNiO2	-0.125152	Li3PO4, O2, LiNiPO4, EuPO4
LiEu(PO3)4	Li0.5NiO2	-0.094321	LiNiPO4, O2, Ni3(PO4)2, EuPO4
LiEu(PO3)4	LMNO	-0.028856	Li2Ni3(P2O7)2, O2, Li4P2O7, LiMnP2O7, EuPO4
LiEu(PO3)4	MNO	-0.027086	MnO2, Li2Ni3(P2O7)2, EuPO4, O2, Ni3(PO4)2
LiEu(PO3)4	LiCoPO4	0	--
LiEu(PO3)4	CoPO4	0	--
LiGa(PO3)4	LiCoO2	-0.081609	Li(CoO2)2, GaPO4, Co3O4, Li3PO4
LiGa(PO3)4	Li0.5CoO2	-0.036914	O2, Li4P2O7, GaPO4, CoPO4
LiGa(PO3)4	LiNiO2	-0.135612	Ga2NiO4, O2, LiNiPO4, Li3PO4
LiGa(PO3)4	Li0.5NiO2	-0.099475	LiNiPO4, O2, GaPO4, Ni3(PO4)2
LiGa(PO3)4	LMNO	-0.035293	GaPO4, O2, Li2Ni3(P2O7)2, Li4P2O7, LiMnP2O7
LiGa(PO3)4	MNO	-0.032499	GaPO4, MnPO4, O2, Ni2P2O7, LiMnP2O7
LiGa(PO3)4	LiCoPO4	-0.005806	LiPO3, GaPO4, LiCo(PO3)3
LiGa(PO3)4	CoPO4	-0.003149	GaPO4, LiCo(PO3)4
LiGd(PO3)4	LiCoO2	-0.077557	GdPO4, Li(CoO2)2, Co3O4, Li3PO4
LiGd(PO3)4	Li0.5CoO2	-0.027514	Li4P2O7, O2, CoPO4, GdPO4
LiGd(PO3)4	LiNiO2	-0.122205	GdPO4, O2, LiNiPO4, Li3PO4
LiGd(PO3)4	Li0.5NiO2	-0.091427	O2, Ni3(PO4)2, LiNiPO4, GdPO4
LiGd(PO3)4	LMNO	-0.025243	Li2Ni3(P2O7)2, O2, Li4P2O7, LiMnP2O7, GdPO4
LiGd(PO3)4	MNO	-0.025521	MnO2, Ni3(PO4)2, GdPO4, O2, Li2Ni3(P2O7)2
LiGd(PO3)4	LiCoPO4	0	--
LiGd(PO3)4	CoPO4	0	--
Li3In2(PO4)3	LiCoO2	-0.039911	Li3PO4, In2O3, Li(CoO2)2, Co3O4
Li3In2(PO4)3	Li0.5CoO2	0	--
Li3In2(PO4)3	LiNiO2	-0.067922	Ni3O4, In2O3, Li3PO4, O2
Li3In2(PO4)3	Li0.5NiO2	-0.027837	Li3PO4, O2, Ni3O4, In2O3
Li3In2(PO4)3	LMNO	0	--
Li3In2(PO4)3	MNO	-0.007603	Ni3(PO4)2, MnO2, InPO4, O2, Li2Mn3NiO8
Li3In2(PO4)3	LiCoPO4	0	--
Li3In2(PO4)3	CoPO4	-0.01016	LiInP2O7, CoO2, LiCoPO4
LiInP2O7	LiCoO2	-0.050076	Co3O4, Li(CoO2)2, In2O3, Li3PO4
LiInP2O7	Li0.5CoO2	0	--
LiInP2O7	LiNiO2	-0.084847	In2O3, Li3PO4, O2, Ni3O4
LiInP2O7	Li0.5NiO2	-0.037803	O2, In2O3, LiNiPO4
LiInP2O7	LMNO	0	--
LiInP2O7	MNO	-0.005994	MnO2, Li2Mn3NiO8, InPO4, Ni3(PO4)2, O2
LiInP2O7	LiCoPO4	0	--
LiInP2O7	CoPO4	0	--
KLi(PO3)2	LiCoO2	-0.058229	K(CoO2)2, Li3PO4, Co3O4
KLi(PO3)2	Li0.5CoO2	-0.010433	KPO3, CoO2, KCo2(PO4)2, Li3PO4
KLi(PO3)2	LiNiO2	-0.089443	KNiPO4, Li3PO4, O2, Ni3O4
KLi(PO3)2	Li0.5NiO2	-0.060332	Li3PO4, O2, K2Ni4P4O15, KNiPO4
KLi(PO3)2	LMNO	-0.014328	K2Ni4P4O15, KMn8O16, KPO3, Li3PO4, O2
KLi(PO3)2	MNO	-0.02245	O2, Li2Ni3(P2O7)2, LiNiPO4, KMn8O16, K2Ni4P4O15
KLi(PO3)2	LiCoPO4	0	--
KLi(PO3)2	CoPO4	0	--
K3LiP2O7	LiCoO2	-0.008654	K(CoO2)2, K3PO4, Co3O4, Li3PO4
K3LiP2O7	Li0.5CoO2	0	--
K3LiP2O7	LiNiO2	-0.023716	NiO, K3PO4, Li3PO4, Li(NiO2)2
K3LiP2O7	Li0.5NiO2	-0.000576	Ni3O4, Li3PO4, K3PO4, O2
K3LiP2O7	LMNO	0	--
K3LiP2O7	MNO	-0.016564	O2, Li2Mn3NiO8, KNiPO4, KMn6O12
K3LiP2O7	LiCoPO4	-0.010028	KPO3, Li3PO4, KCoPO4
K3LiP2O7	CoPO4	-0.019051	KCo2(PO4)2, O2, Li3PO4, KPO3
LiLa(PO3)4	LiCoO2	-0.075124	LaPO4, Li(CoO2)2, Li3PO4, Co3O4
LiLa(PO3)4	Li0.5CoO2	-0.02187	Li4P2O7, CoPO4, LaPO4, O2
LiLa(PO3)4	LiNiO2	-0.117283	O2, Li3PO4, LaPO4, LiNiPO4
LiLa(PO3)4	Li0.5NiO2	-0.086595	O2, LaPO4, LiNiPO4, Ni3(PO4)2
LiLa(PO3)4	LMNO	-0.020905	Li4P2O7, LiNiPO4, LaPO4, MnO2
LiLa(PO3)4	MNO	-0.022908	O2, Ni3(PO4)2, LaPO4, MnO2, Li2Ni3(P2O7)2
LiLa(PO3)4	LiCoPO4	0	--
LiLa(PO3)4	CoPO4	0	--
LiTiPO5	LiCoO2	-0.039913	TiO2, Li3PO4, Li(CoO2)2, Co3O4
LiTiPO5	Li0.5CoO2	0	--
LiTiPO5	LiNiO2	-0.06559	Li3PO4, Ni3O4, TiO2, O2
LiTiPO5	Li0.5NiO2	-0.02857	O2, Li3PO4, Ni3O4, TiO2
LiTiPO5	LMNO	0	--
LiTiPO5	MNO	-0.008842	Li2Mn3NiO8, Ti2Ni(PO5)2, O2, MnO2
LiTiPO5	LiCoPO4	0	--
LiTiPO5	CoPO4	-0.013976	LiCoPO4, CoO2, LiTi2(PO4)3
LiScP2O7	LiCoO2	-0.041312	Co3O4, Li3Sc2(PO4)3, Li(CoO2)2, Li3PO4
LiScP2O7	Li0.5CoO2	0	--
LiScP2O7	LiNiO2	-0.073518	O2, Sc2O3, Ni3O4, Li3PO4
LiScP2O7	Li0.5NiO2	-0.031106	Ni3O4, O2, Li3PO4, Li3Sc2(PO4)3
LiScP2O7	LMNO	-0.000502	Li3Sc2(PO4)3, LiNiPO4, MnO2
LiScP2O7	MNO	-0.006334	ScPO4, Ni3(PO4)2, MnO2, Li2Mn3NiO8, O2
LiScP2O7	LiCoPO4	0	--
LiScP2O7	CoPO4	0	--
LiNd(PO3)4	LiCoO2	-0.074851	Li(CoO2)2, Li3PO4, Co3O4, NdPO4
LiNd(PO3)4	Li0.5CoO2	-0.021236	Li4P2O7, CoPO4, O2, NdPO4
LiNd(PO3)4	LiNiO2	-0.11673	LiNiPO4, O2, NdPO4, Li3PO4
LiNd(PO3)4	Li0.5NiO2	-0.086052	O2, NdPO4, Ni3(PO4)2, LiNiPO4
LiNd(PO3)4	LMNO	-0.020522	Li4P2O7, NdPO4, MnO2, LiNiPO4
LiNd(PO3)4	MNO	-0.022614	MnO2, NdPO4, O2, Ni3(PO4)2, Li2Ni3(P2O7)2
LiNd(PO3)4	LiCoPO4	0	--
LiNd(PO3)4	CoPO4	0	--
Na5Li(PO4)2	LiCoO2	0	--
Na5Li(PO4)2	Li0.5CoO2	-0.006885	Na(CoO2)2, NaLi2PO4
Na5Li(PO4)2	LiNiO2	-0.001677	NaLi2PO4, NaNiO2
Na5Li(PO4)2	Li0.5NiO2	-0.001101	NaLi2PO4, Na(NiO2)2
Na5Li(PO4)2	LMNO	0	--
Na5Li(PO4)2	MNO	-0.020208	O2, Li2Mn3NiO8, NaNiPO4, Na4P2O7, Na2Mn3O7
Na5Li(PO4)2	LiCoPO4	-0.019007	NaCoPO4, NaLi2PO4
Na5Li(PO4)2	CoPO4	-0.038829	Li3PO4, Na4P2O7, Li(CoO2)2, Co3O4
NaLi2PO4	LiCoO2	0	--
NaLi2PO4	Li0.5CoO2	0	--
NaLi2PO4	LiNiO2	0	--
NaLi2PO4	Li0.5NiO2	0	--
NaLi2PO4	LMNO	0	--
NaLi2PO4	MNO	-0.016236	Na4Ni3P4O15, O2, MnO2, Li2Mn3NiO8
NaLi2PO4	LiCoPO4	-0.008598	NaCoPO4, Li3PO4
NaLi2PO4	CoPO4	-0.011983	NaCoPO4, Li3PO4, CoO2, Na5P3O10
LiSn2(PO4)3	LiCoO2	-0.059108	SnO2, Li(CoO2)2, Co3O4, Li3PO4
LiSn2(PO4)3	Li0.5CoO2	0	--
LiSn2(PO4)3	LiNiO2	-0.095046	O2, SnO2, Ni3O4, Li3PO4
LiSn2(PO4)3	Li0.5NiO2	-0.054781	LiNiPO4, Ni3(PO4)2, O2, SnO2
LiSn2(PO4)3	LMNO	0	--
LiSn2(PO4)3	MNO	-0.008531	MnO2, O2, SnO2, LiNiPO4, Ni3(PO4)2
LiSn2(PO4)3	LiCoPO4	0	--
LiSn2(PO4)3	CoPO4	0	--
Li3Sc2(PO4)3	LiCoO2	-0.02336	Co3O4, Sc2O3, Li3PO4, Li(CoO2)2
Li3Sc2(PO4)3	Li0.5CoO2	0	--
Li3Sc2(PO4)3	LiNiO2	-0.049534	Li3PO4, Sc2O3, Ni3O4, Li(NiO2)2
Li3Sc2(PO4)3	Li0.5NiO2	-0.014489	O2, Li3PO4, Ni3O4, Sc2O3
Li3Sc2(PO4)3	LMNO	0	--
Li3Sc2(PO4)3	MNO	-0.005791	ScPO4, MnO2, Ni3(PO4)2, Li2Mn3NiO8, O2
Li3Sc2(PO4)3	LiCoPO4	0	--
Li3Sc2(PO4)3	CoPO4	-0.006248	CoO2, LiScP2O7, LiCoPO4
LiZnPO4	LiCoO2	-0.030865	Li(CoO2)2, ZnO, Zn5Co19O32, Li3PO4
LiZnPO4	Li0.5CoO2	0	--
LiZnPO4	LiNiO2	-0.056505	Li3PO4, Zn(NiO2)2
LiZnPO4	Li0.5NiO2	-0.020317	O2, Li3PO4, Ni3O4, Zn(NiO2)2
LiZnPO4	LMNO	0	--
LiZnPO4	MNO	0	--
LiZnPO4	LiCoPO4	0	--
LiZnPO4	CoPO4	0	--
LiTi2(PO4)3	LiCoO2	-0.051389	Co3O4, Li(CoO2)2, TiO2, Li3PO4
LiTi2(PO4)3	Li0.5CoO2	0	--
LiTi2(PO4)3	LiNiO2	-0.086092	O2, TiO2, Li3PO4, Ni3O4
LiTi2(PO4)3	Li0.5NiO2	-0.039834	LiNiPO4, TiO2, O2, Ni3O4
LiTi2(PO4)3	LMNO	0	--
LiTi2(PO4)3	MNO	-0.00521	MnO2, Ti2Ni(PO5)2, Li2Mn3NiO8, Ni3(PO4)2, O2
LiTi2(PO4)3	LiCoPO4	0	--
LiTi2(PO4)3	CoPO4	0	--
Na3LiP2O7	LiCoO2	-0.0246	Na5Li(PO4)2, NaLi2PO4, Na(CoO2)2, Co3O4
Na3LiP2O7	Li0.5CoO2	-0.000375	Li3PO4, CoO2, NaCoPO4, Na4P2O7
Na3LiP2O7	LiNiO2	-0.042132	NaLi2PO4, Ni3O4, Na4(NiO2)9, Na5Li(PO4)2
Na3LiP2O7	Li0.5NiO2	-0.016053	O2, NaLi2PO4, Ni3O4, Na5Li(PO4)2
Na3LiP2O7	LMNO	-0.00114	MnO2, Li3PO4, Na4Ni3P4O15, Na4P2O7
Na3LiP2O7	MNO	-0.012517	O2, NaMn8O16, NaNiPO4, Li2Mn3NiO8, Na4P2O7
Na3LiP2O7	LiCoPO4	-0.002017	NaCoPO4, Li4P2O7
Na3LiP2O7	CoPO4	-0.002069	Li4P2O7, CoO2, Na2CoP2O7, NaPO3
LiMgPO4	LiCoO2	-0.014502	Li3PO4, Mg(CoO2)2
LiMgPO4	Li0.5CoO2	0	--
LiMgPO4	LiNiO2	-0.028384	Li3PO4, MgNiO2, Li(NiO2)2
LiMgPO4	Li0.5NiO2	0	--
LiMgPO4	LMNO	0	--
LiMgPO4	MNO	-0.00653	O2, Li2Mn3NiO8, Mg3(PO4)2, MnO2, Ni3(PO4)2
LiMgPO4	LiCoPO4	0	--
LiMgPO4	CoPO4	-0.001654	LiCoPO4, CoO2, Li4P2O7, LiMg3P3O11
LiMg3P3O11	LiCoO2	-0.033084	LiMgPO4, Co3O4, Li(CoO2)2
LiMg3P3O11	Li0.5CoO2	-0.001417	CoO2, LiMgPO4, Co3O4
LiMg3P3O11	LiNiO2	-0.048759	Mg(NiO2)2, Li(NiO2)2, Li3PO4, Ni3O4
LiMg3P3O11	Li0.5NiO2	-0.026139	O2, LiMgPO4, Ni3O4
LiMg3P3O11	LMNO	-0.0008	Mg3(PO4)2, LiMgPO4, MnO2, LiNiPO4
LiMg3P3O11	MNO	-0.006109	Ni3(PO4)2, MnO2, O2, Mg3(PO4)2, Li2Mn3NiO8
LiMg3P3O11	LiCoPO4	0	--
LiMg3P3O11	CoPO4	0	--
LiZr2(PO4)3	LiCoO2	-0.036426	Li(CoO2)2, Co3O4, ZrO2, Li3PO4
LiZr2(PO4)3	Li0.5CoO2	0	--
LiZr2(PO4)3	LiNiO2	-0.068735	Li3PO4, Ni3O4, ZrO2, O2
LiZr2(PO4)3	Li0.5NiO2	-0.023691	Li3PO4, Ni3O4, O2, ZrO2
LiZr2(PO4)3	LMNO	0	--
LiZr2(PO4)3	MNO	0	--
LiZr2(PO4)3	LiCoPO4	0	--
LiZr2(PO4)3	CoPO4	0	--
LiSm(PO3)4	LiCoO2	-0.076458	Co3O4, Li(CoO2)2, Li3PO4, SmPO4
LiSm(PO3)4	Li0.5CoO2	-0.024964	SmPO4, Li4P2O7, O2, CoPO4
LiSm(PO3)4	LiNiO2	-0.119981	Li3PO4, SmPO4, O2, LiNiPO4
LiSm(PO3)4	Li0.5NiO2	-0.089244	LiNiPO4, SmPO4, Ni3(PO4)2, O2
LiSm(PO3)4	LMNO	-0.022905	SmPO4, MnO2, Li2Ni3(P2O7)2, Li4P2O7
LiSm(PO3)4	MNO	-0.02434	Li2Ni3(P2O7)2, Ni3(PO4)2, O2, MnO2, SmPO4
LiSm(PO3)4	LiCoPO4	0	--
LiSm(PO3)4	CoPO4	0	--
Li2B3PO8	LiCoO2	-0.038812	Li3PO4, Li3B7O12, Li(CoO2)2, Co3O4
Li2B3PO8	Li0.5CoO2	0	--
Li2B3PO8	LiNiO2	-0.064319	Li3B7O12, Li3PO4, Ni3BO5, O2
Li2B3PO8	Li0.5NiO2	-0.040825	O2, Li3B7O12, Li3PO4, Ni3BO5
Li2B3PO8	LMNO	-0.000262	Li3PO4, LiNiPO4, Li3B7O12, MnO2
Li2B3PO8	MNO	-0.007354	Ni3(PO4)2, Li3B11O18, MnO2, Li2Mn3NiO8, O2
Li2B3PO8	LiCoPO4	0	--
Li2B3PO8	CoPO4	-0.00678	BPO4, LiCoPO4, CoO2
LiSi2BO6	LiCoO2	-0.003972	Li(CoO2)2, Li3B7O12, Li2Si2O5, Co3O4
LiSi2BO6	Li0.5CoO2	0	--
LiSi2BO6	LiNiO2	-0.034735	Li2SiO3, LiBO2, Li(NiO2)2, Ni3BO5
LiSi2BO6	Li0.5NiO2	-0.007238	O2, Li2Si2O5, Li2SiO3, Ni3BO5
LiSi2BO6	LMNO	0	--
LiSi2BO6	MNO	-0.020076	SiO2, O2, Li2Mn3NiO8, Li3B7O12
LiSi2BO6	LiCoPO4	-0.009154	SiO2, Li3PO4, Li3B7O12, Co4B6O13
LiSi2BO6	CoPO4	-0.021596	Li3PO4, Co3O4, Li3B7O12, SiO2, Li(CoO2)2
LiAlB2O5	LiCoO2	0	--
LiAlB2O5	Li0.5CoO2	0	--
LiAlB2O5	LiNiO2	-0.020812	Li2AlBO4, Li(NiO2)2, Ni3BO5, LiBO2
LiAlB2O5	Li0.5NiO2	0	--
LiAlB2O5	LMNO	0	--
LiAlB2O5	MNO	-0.010554	Al5BO9, Li2Al(BO2)5, O2, Li2Mn3NiO8
LiAlB2O5	LiCoPO4	-0.004772	Li3B7O12, Co4B6O13, Li3PO4, Al5BO9
LiAlB2O5	CoPO4	-0.04486	Li(CoO2)2, AlPO4, Li3B7O12, Co3O4, CoO2
Li2Al(BO2)5	LiCoO2	-0.001802	LiAlB2O5, Li(CoO2)2, Li3B7O12, Co3O4
Li2Al(BO2)5	Li0.5CoO2	0	--
Li2Al(BO2)5	LiNiO2	-0.021831	LiBO2, Li(NiO2)2, Li2AlBO4, Ni3BO5
Li2Al(BO2)5	Li0.5NiO2	-0.002383	O2, Li3B7O12, Ni3BO5, LiAlB2O5
Li2Al(BO2)5	LMNO	0	--
Li2Al(BO2)5	MNO	-0.001936	Al4(B2O5)3, O2, Li3B11O18, Li2Mn3NiO8
Li2Al(BO2)5	LiCoPO4	-0.000481	Al5BO9, Li3B7O12, Co4B6O13, AlPO4
Li2Al(BO2)5	CoPO4	-0.024072	Li3B7O12, Co3O4, Li3B11O18, CoO2, AlPO4
Li2AlBO4	LiCoO2	0	--
Li2AlBO4	Li0.5CoO2	0	--
Li2AlBO4	LiNiO2	0	--
Li2AlBO4	Li0.5NiO2	0	--
Li2AlBO4	LMNO	0	--
Li2AlBO4	MNO	-0.051061	Li3B7O12, O2, Al5BO9, Li2Mn3NiO8
Li2AlBO4	LiCoPO4	-0.030893	Li3PO4, Li3B7O12, Al2CoO4, Co4B6O13
Li2AlBO4	CoPO4	-0.084622	Li3B7O12, Co3O4, Li3PO4, Li(CoO2)2, AlPO4
KLiB4O7	LiCoO2	0	--
KLiB4O7	Li0.5CoO2	0	--
KLiB4O7	LiNiO2	-0.005129	Li6B4O9, Li(NiO2)2, KBO2, Ni3BO5
KLiB4O7	Li0.5NiO2	0	--
KLiB4O7	LMNO	0	--
KLiB4O7	MNO	-0.025808	Li2Mn3NiO8, KB5O8, O2, K5B19O31
KLiB4O7	LiCoPO4	-0.009435	Co4B6O13, K5B19O31, KCoPO4, Li3PO4
KLiB4O7	CoPO4	-0.030735	Co3O4, Li3PO4, KB5O8, KCo2(PO4)2, Li(CoO2)2
BaLiBO3	LiCoO2	0	--
BaLiBO3	Li0.5CoO2	0	--
BaLiBO3	LiNiO2	0	--
BaLiBO3	Li0.5NiO2	0	--
BaLiBO3	LMNO	0	--
BaLiBO3	MNO	-0.057586	Li2Mn3NiO8, Ba3Mn2O8, O2, Ba(BO2)2, BaNiO3
BaLiBO3	LiCoPO4	-0.050075	Li3PO4, CoO, Ba3(PO4)2, Ba2Li(BO2)5
BaLiBO3	CoPO4	-0.144325	Li(CoO2)2, Li3PO4, BaLi(B3O5)3, Co3O4, Ba2P2O7
Ba2Li(BO2)5	LiCoO2	0	--
Ba2Li(BO2)5	Li0.5CoO2	0	--
Ba2Li(BO2)5	LiNiO2	0	--
Ba2Li(BO2)5	Li0.5NiO2	0	--
Ba2Li(BO2)5	LMNO	0	--
Ba2Li(BO2)5	MNO	-0.012871	O2, Li2Mn3NiO8, Ba(BO2)2, BaB4O7
Ba2Li(BO2)5	LiCoPO4	-0.010873	BaLi(B3O5)3, Ba3(PO4)2, Li3PO4, Co4B6O13
Ba2Li(BO2)5	CoPO4	-0.066961	BaBPO5, Li3PO4, BaLi(B3O5)3, Li(CoO2)2, Co3O4
Cs2Li5(BO2)7	LiCoO2	0	--
Cs2Li5(BO2)7	Li0.5CoO2	0	--
Cs2Li5(BO2)7	LiNiO2	0	--
Cs2Li5(BO2)7	Li0.5NiO2	0	--
Cs2Li5(BO2)7	LMNO	0	--
Cs2Li5(BO2)7	MNO	-0.054694	Ni3BO5, CsMnO4, O2, Li2Mn3NiO8, CsLi(B3O5)2
Cs2Li5(BO2)7	LiCoPO4	-0.032243	CoO, Li3PO4, CsLi(B3O5)2, CsCoPO4
Cs2Li5(BO2)7	CoPO4	-0.079565	CsCoPO4, Li(CoO2)2, Li3PO4, Co3O4, CsLi(B3O5)2
Rb2Li5(BO2)7	LiCoO2	0	--
Rb2Li5(BO2)7	Li0.5CoO2	0	--
Rb2Li5(BO2)7	LiNiO2	0	--
Rb2Li5(BO2)7	Li0.5NiO2	0	--
Rb2Li5(BO2)7	LMNO	-0.002045	Li2MnO3, Rb2B4O7, RbLiB4O7, NiO
Rb2Li5(BO2)7	MNO	-0.05479	O2, Rb5B19O31, Rb2B4O7, Li2Mn3NiO8
Rb2Li5(BO2)7	LiCoPO4	-0.02842	Li3PO4, CoO, Rb2B4O7, Rb5B19O31
Rb2Li5(BO2)7	CoPO4	-0.078698	Li(CoO2)2, Co3O4, RbPO3, Li3PO4, Rb5B19O31
BaLi(B3O5)3	LiCoO2	0	--
BaLi(B3O5)3	Li0.5CoO2	0	--
BaLi(B3O5)3	LiNiO2	-0.018599	Li(NiO2)2, Ba2Li(BO2)5, LiBO2, Ni3BO5
BaLi(B3O5)3	Li0.5NiO2	0	--
BaLi(B3O5)3	LMNO	0	--
BaLi(B3O5)3	MNO	0	--
BaLi(B3O5)3	LiCoPO4	0	--
BaLi(B3O5)3	CoPO4	-0.002858	LiCoPO4, BaBPO5, CoO2, Co3O4, BPO4
Li3B5(HO5)2	LiCoO2	0	--
Li3B5(HO5)2	Li0.5CoO2	0	--
Li3B5(HO5)2	LiNiO2	-0.00663	LiBO2, H2O, Ni3BO5, Li(NiO2)2
Li3B5(HO5)2	Li0.5NiO2	0	--
Li3B5(HO5)2	LMNO	0	--
Li3B5(HO5)2	MNO	-0.024013	O2, Li2Mn3NiO8, LiB5H2O9
Li3B5(HO5)2	LiCoPO4	-0.006929	Co4B6O13, Li3PO4, B(HO)3, LiB5H2O9
Li3B5(HO5)2	CoPO4	-0.027861	Co3O4, LiB5H2O9, Li3PO4, Li(CoO2)2
SrLi(B3O5)3	LiCoO2	-0.007314	Li3B7O12, Co3O4, Sr4B14O25, Li(CoO2)2
SrLi(B3O5)3	Li0.5CoO2	0	--
SrLi(B3O5)3	LiNiO2	-0.026991	LiBO2, Li(NiO2)2, Sr(BO2)2, Ni3BO5
SrLi(B3O5)3	Li0.5NiO2	-0.008845	Li3B7O12, O2, Sr(BO2)2, Ni3BO5
SrLi(B3O5)3	LMNO	0	--
SrLi(B3O5)3	MNO	0	--
SrLi(B3O5)3	LiCoPO4	0	--
SrLi(B3O5)3	CoPO4	-0.008029	BPO4, SrBPO5, LiCoPO4, Co3O4, CoO2
Li3Sc(BO3)2	LiCoO2	0	--
Li3Sc(BO3)2	Li0.5CoO2	0	--
Li3Sc(BO3)2	LiNiO2	0	--
Li3Sc(BO3)2	Li0.5NiO2	0	--
Li3Sc(BO3)2	LMNO	0	--
Li3Sc(BO3)2	MNO	-0.056566	Li3B7O12, Li2Mn3NiO8, O2, ScBO3
Li3Sc(BO3)2	LiCoPO4	-0.032006	Li3PO4, Co4B6O13, Sc2O3, CoO
Li3Sc(BO3)2	CoPO4	-0.093736	Li3Sc2(PO4)3, Co3O4, Li(CoO2)2, Li3B7O12, Li3PO4
CsLi5(BO3)2	LiCoO2	0	--
CsLi5(BO3)2	Li0.5CoO2	-0.017168	CsBO2, Li7Co5O12, Li5Co3O8, Cs2Li5(BO2)7
CsLi5(BO3)2	LiNiO2	0	--
CsLi5(BO3)2	Li0.5NiO2	-0.015357	CsBO2, Cs2Li5(BO2)7, Li2NiO3, NiO
CsLi5(BO3)2	LMNO	-0.028709	CsBO2, Cs2Li5(BO2)7, NiO, Li2MnO3
CsLi5(BO3)2	MNO	-0.097304	CsLi(B3O5)2, CsMnO4, Li(NiO2)2, Li2Mn3NiO8, O2
CsLi5(BO3)2	LiCoPO4	-0.071069	CoO, Li3PO4, CsLi(B3O5)2, CsBO2
CsLi5(BO3)2	CoPO4	-0.169452	CsCoPO4, CsLi(B3O5)2, Li3PO4, Li(CoO2)2, Co3O4
NaLiB4O7	LiCoO2	0	--
NaLiB4O7	Li0.5CoO2	0	--
NaLiB4O7	LiNiO2	-0.007764	Li(NiO2)2, Ni3BO5, NaBO2, LiBO2
NaLiB4O7	Li0.5NiO2	0	--
NaLiB4O7	LMNO	0	--
NaLiB4O7	MNO	-0.018167	O2, Na2B8O13, Li2Mn3NiO8
NaLiB4O7	LiCoPO4	-0.003543	Li3PO4, Na2B8O13, Co4B6O13, NaB3O5
NaLiB4O7	CoPO4	-0.024149	Li3B7O12, Li3B11O18, Co3O4, CoO2, Na2LiB5(PO7)2
Li4Ca(BO3)2	LiCoO2	0	--
Li4Ca(BO3)2	Li0.5CoO2	0	--
Li4Ca(BO3)2	LiNiO2	0	--
Li4Ca(BO3)2	Li0.5NiO2	0	--
Li4Ca(BO3)2	LMNO	-0.006104	NiO, Ca2B2O5, Li2MnO3, LiBO2
Li4Ca(BO3)2	MNO	-0.074571	Ca(BO2)2, O2, Li2Mn3NiO8
Li4Ca(BO3)2	LiCoPO4	-0.046346	CoO, Li3PO4, Ca(BO2)2
Li4Ca(BO3)2	CoPO4	-0.12749	Li3PO4, CaB4O7, Ca3(PO4)2, Li(CoO2)2, Co3O4
Li3Gd(BO3)2	LiCoO2	0	--
Li3Gd(BO3)2	Li0.5CoO2	0	--
Li3Gd(BO3)2	LiNiO2	0	--
Li3Gd(BO3)2	Li0.5NiO2	0	--
Li3Gd(BO3)2	LMNO	0	--
Li3Gd(BO3)2	MNO	-0.056033	Gd5B3O13, O2, Li2Mn3NiO8, Gd(BO2)3
Li3Gd(BO3)2	LiCoPO4	-0.030142	GdPO4, Co4B6O13, CoO, Li3PO4
Li3Gd(BO3)2	CoPO4	-0.11344	GdPO4, Li3PO4, Li3B7O12, Co3O4, Li(CoO2)2
K2LiBO3	LiCoO2	0	--
K2LiBO3	Li0.5CoO2	-0.03592	Li5Co3O8, K(CoO2)2, KBO2, Li7Co5O12
K2LiBO3	LiNiO2	0	--
K2LiBO3	Li0.5NiO2	-0.007434	KBO2, Li2NiO3, NiO, KO2
K2LiBO3	LMNO	-0.023747	Li2MnO3, NiO, KMnO2, KBO2, K11LiMn4O16
K2LiBO3	MNO	-0.115973	Li2Mn3NiO8, K2MnO4, Li(NiO2)2, KBO2
K2LiBO3	LiCoPO4	-0.094091	Li3PO4, CoO, K3PO4, KBO2
K2LiBO3	CoPO4	-0.195015	Li3PO4, K(CoO2)2, K2B4O7, K3LiP2O7, Co3O4
Na4Li5(BO3)3	LiCoO2	0	--
Na4Li5(BO3)3	Li0.5CoO2	-0.011774	Na4(CoO2)7, NaBO2, Li7Co5O12, Li5Co3O8
Na4Li5(BO3)3	LiNiO2	-0.00277	NaLi2BO3, NaNiO2
Na4Li5(BO3)3	Li0.5NiO2	-0.010072	NiO, Li2NiO3, NaNiO2, NaBO2
Na4Li5(BO3)3	LMNO	-0.020782	NiO, Na4B2O5, Li2MnO3, NaBO2
Na4Li5(BO3)3	MNO	-0.085581	Na(NiO2)2, Li2Mn3NiO8, Na2Mn3O7, O2, NaBO2
Na4Li5(BO3)3	LiCoPO4	-0.068562	Na2B4O7, CoO, NaLi2PO4, Li3PO4
Na4Li5(BO3)3	CoPO4	-0.162515	Co3O4, Li(CoO2)2, Na(CoO2)2, NaLi2PO4, Na3B7O12
KLi2BO3	LiCoO2	0	--
KLi2BO3	Li0.5CoO2	-0.02499	KBO2, Li5Co3O8, Li7Co5O12
KLi2BO3	LiNiO2	0	--
KLi2BO3	Li0.5NiO2	-0.02318	NiO, Li2NiO3, KBO2
KLi2BO3	LMNO	-0.036532	NiO, KBO2, Li2MnO3
KLi2BO3	MNO	-0.097575	Li2Mn3NiO8, O2, Li(NiO2)2, KBO2
KLi2BO3	LiCoPO4	-0.078573	Li3PO4, KBO2, CoO
KLi2BO3	CoPO4	-0.173837	Co3O4, K(CoO2)2, Li3PO4, K3LiP2O7, K2B4O7
NaLi2BO3	LiCoO2	0	--
NaLi2BO3	Li0.5CoO2	-0.010234	NaBO2, Li7Co5O12, Li5Co3O8
NaLi2BO3	LiNiO2	0	--
NaLi2BO3	Li0.5NiO2	-0.008423	Li2NiO3, NaBO2, NiO
NaLi2BO3	LMNO	-0.021775	NiO, NaBO2, Li2MnO3
NaLi2BO3	MNO	-0.086702	O2, Li2Mn3NiO8, NaBO2
NaLi2BO3	LiCoPO4	-0.065196	Na2B4O7, Li3PO4, CoO, NaLi2PO4
NaLi2BO3	CoPO4	-0.158206	Co3O4, Na3B7O12, NaLi2PO4, Li(CoO2)2, Li3PO4
LiGeBO4	LiCoO2	-0.000315	Co3O4, Li2GeO3, Li3B7O12, Li(CoO2)2
LiGeBO4	Li0.5CoO2	0	--
LiGeBO4	LiNiO2	-0.027487	LiBO2, Li(NiO2)2, Ni3BO5, Li2GeO3
LiGeBO4	Li0.5NiO2	-0.007879	Li2GeO3, O2, Li3B7O12, Li2NiGe3O8
LiGeBO4	LMNO	0	--
LiGeBO4	MNO	-0.005492	Ni2GeO4, MnO2, O2, Li2Mn3NiO8, Li3B11O18
LiGeBO4	LiCoPO4	0	--
LiGeBO4	CoPO4	-0.007848	CoO2, GeO2, BPO4, LiCoPO4
Li6Ho(BO3)3	LiCoO2	0	--
Li6Ho(BO3)3	Li0.5CoO2	-0.00157	Li6B4O9, Li5Co3O8, Li7Co5O12, HoBO3
Li6Ho(BO3)3	LiNiO2	0	--
Li6Ho(BO3)3	Li0.5NiO2	-0.000282	NiO, Li2NiO3, HoBO3, Li6B4O9
Li6Ho(BO3)3	LMNO	-0.010585	Li2MnO3, NiO, LiBO2, HoBO3
Li6Ho(BO3)3	MNO	-0.074016	Li3B7O12, HoBO3, Li2Mn3NiO8, O2
Li6Ho(BO3)3	LiCoPO4	-0.048884	Li3PO4, CoO, Co4B6O13, HoBO3
Li6Ho(BO3)3	CoPO4	-0.127496	HoPO4, Co3O4, Li(CoO2)2, Li3B7O12, Li3PO4
Li6Y(BO3)3	LiCoO2	0	--
Li6Y(BO3)3	Li0.5CoO2	-0.001199	Li7Co5O12, YBO3, Li6B4O9, Li5Co3O8
Li6Y(BO3)3	LiNiO2	0	--
Li6Y(BO3)3	Li0.5NiO2	0	--
Li6Y(BO3)3	LMNO	-0.010253	LiBO2, NiO, YBO3, Li2MnO3
Li6Y(BO3)3	MNO	-0.073796	Li3B7O12, O2, Li2Mn3NiO8, YBO3
Li6Y(BO3)3	LiCoPO4	-0.04861	Li3PO4, Co4B6O13, CoO, YBO3
Li6Y(BO3)3	CoPO4	-0.127146	Li3B7O12, YPO4, Li3PO4, Co3O4, Li(CoO2)2
SrLiBO3	LiCoO2	0	--
SrLiBO3	Li0.5CoO2	0	--
SrLiBO3	LiNiO2	0	--
SrLiBO3	Li0.5NiO2	0	--
SrLiBO3	LMNO	-0.00105	Sr2B2O5, NiO, Li2MnO3
SrLiBO3	MNO	-0.056768	O2, Sr2B2O5, Li2Mn3NiO8
SrLiBO3	LiCoPO4	-0.039745	Sr3(PO4)2, CoO, Li3PO4, Sr(BO2)2
SrLiBO3	CoPO4	-0.129001	Co3O4, SrLi(B3O5)3, Sr6B(PO4)5, Li3PO4, Li(CoO2)2
RbLiB4O7	LiCoO2	0	--
RbLiB4O7	Li0.5CoO2	0	--
RbLiB4O7	LiNiO2	-0.005346	Li6B4O9, Ni3BO5, Li(NiO2)2, Rb2Li5(BO2)7
RbLiB4O7	Li0.5NiO2	0	--
RbLiB4O7	LMNO	0	--
RbLiB4O7	MNO	-0.024287	Li2Mn3NiO8, Rb5B19O31, O2, RbB5O8
RbLiB4O7	LiCoPO4	-0.007054	Rb5B19O31, Co4B6O13, Li3PO4, CoO
RbLiB4O7	CoPO4	-0.027435	Rb5B19O31, Li(CoO2)2, RbB5O8, Co3O4, Li3PO4
CsLi(B3O5)2	LiCoO2	0	--
CsLi(B3O5)2	Li0.5CoO2	0	--
CsLi(B3O5)2	LiNiO2	-0.004444	Li(NiO2)2, NiO, Cs2Li5(BO2)7, Li6B4O9
CsLi(B3O5)2	Li0.5NiO2	0	--
CsLi(B3O5)2	LMNO	0	--
CsLi(B3O5)2	MNO	0	--
CsLi(B3O5)2	LiCoPO4	0	--
CsLi(B3O5)2	CoPO4	0	--
Li6Yb(BO3)3	LiCoO2	0	--
Li6Yb(BO3)3	Li0.5CoO2	-0.000446	YbCoO3, Li5Co3O8, Li6B4O9, O2
Li6Yb(BO3)3	LiNiO2	0	--
Li6Yb(BO3)3	Li0.5NiO2	0	--
Li6Yb(BO3)3	LMNO	-0.013737	Ni3BO5, LiBO2, Li2MnO3, YbMnO3, Li(NiO2)2
Li6Yb(BO3)3	MNO	-0.075356	Li2Mn3NiO8, Ni3BO5, YbMnO3, YbB4O7, O2
Li6Yb(BO3)3	LiCoPO4	-0.068168	YbB4O7, YbO, Co3O4, Li3PO4, CoO
Li6Yb(BO3)3	CoPO4	-0.131617	Li3PO4, YbCoO3, YbB4O7, Li(CoO2)2
LiCdBO3	LiCoO2	0	--
LiCdBO3	Li0.5CoO2	0	--
LiCdBO3	LiNiO2	0	--
LiCdBO3	Li0.5NiO2	0	--
LiCdBO3	LMNO	0	--
LiCdBO3	MNO	-0.045331	CdB4O7, Li2Mn3NiO8, Mn3Cd2O8, Ni3BO5, O2
LiCdBO3	LiCoPO4	-0.011116	Co4B6O13, Li3PO4, CoO, Cd3BPO7
LiCdBO3	CoPO4	-0.082093	Li3PO4, Co3O4, Li(CoO2)2, Cd3(PO4)2, CdB4O7
LiEu6B3O14	LiCoO2	0	--
LiEu6B3O14	Li0.5CoO2	0	--
LiEu6B3O14	LiNiO2	0	--
LiEu6B3O14	Li0.5NiO2	0	--
LiEu6B3O14	LMNO	0	--
LiEu6B3O14	MNO	-0.032657	Ni3BO5, Li2Mn3NiO8, EuBO3, O2, Eu2Mn2O7
LiEu6B3O14	LiCoPO4	-0.034058	Eu5P3O13, Li3PO4, EuBO3, EuPO4, Co3O4
LiEu6B3O14	CoPO4	-0.112932	Co3O4, Li3B7O12, Li3B11O18, CoO2, EuPO4
Li6Nd(BO3)3	LiCoO2	0	--
Li6Nd(BO3)3	Li0.5CoO2	-0.000828	Li7Co5O12, NdBO3, Li5Co3O8, Li6B4O9
Li6Nd(BO3)3	LiNiO2	0	--
Li6Nd(BO3)3	Li0.5NiO2	0	--
Li6Nd(BO3)3	LMNO	-0.009922	LiBO2, NiO, NdBO3, Li2MnO3
Li6Nd(BO3)3	MNO	-0.073577	Li3B7O12, NdBO3, O2, Li2Mn3NiO8
Li6Nd(BO3)3	LiCoPO4	-0.048337	NdBO3, Li3PO4, Co4B6O13, CoO
Li6Nd(BO3)3	CoPO4	-0.130482	Co3O4, NdPO4, Li3PO4, Li3B7O12, Li(CoO2)2
Li6Sm(BO3)3	LiCoO2	0	--
Li6Sm(BO3)3	Li0.5CoO2	0	--
Li6Sm(BO3)3	LiNiO2	0	--
Li6Sm(BO3)3	Li0.5NiO2	0	--
Li6Sm(BO3)3	LMNO	-0.008306	LiBO2, SmBO3, Li2MnO3, NiO
Li6Sm(BO3)3	MNO	-0.072508	Li3B7O12, Li2Mn3NiO8, SmBO3, O2
Li6Sm(BO3)3	LiCoPO4	-0.047004	Li3PO4, CoO, Co4B6O13, SmBO3
Li6Sm(BO3)3	CoPO4	-0.128972	Co3O4, Li(CoO2)2, Li3PO4, SmPO4, Li3B7O12
Li6Tm(BO3)3	LiCoO2	0	--
Li6Tm(BO3)3	Li0.5CoO2	0	--
Li6Tm(BO3)3	LiNiO2	0	--
Li6Tm(BO3)3	Li0.5NiO2	0	--
Li6Tm(BO3)3	LMNO	-0.004789	LiBO2, LiTm6B3O14, Li2MnO3, NiO
Li6Tm(BO3)3	MNO	-0.071175	Li2Mn3NiO8, Li3B7O12, O2, Tm3B5O12
Li6Tm(BO3)3	LiCoPO4	-0.044002	Li3PO4, Co4B6O13, Tm3B5O12, CoO
Li6Tm(BO3)3	CoPO4	-0.128478	Co3O4, TmPO4, Li(CoO2)2, Li3B7O12, Li3PO4
LiNd6B3O14	LiCoO2	0	--
LiNd6B3O14	Li0.5CoO2	0	--
LiNd6B3O14	LiNiO2	0	--
LiNd6B3O14	Li0.5NiO2	-0.008398	NdBO3, Li2NiO3, NdNiO3, O2
LiNd6B3O14	LMNO	-0.013765	NdBO3, O2, Li2MnO3, NdMn2O5, Nd2MnNiO6
LiNd6B3O14	MNO	-0.051959	O2, NdBO3, Li2Mn3NiO8, Nd2MnNiO6, NdMn2O5
LiNd6B3O14	LiCoPO4	-0.047431	CoO, NdBO3, Li3PO4, NdPO4
LiNd6B3O14	CoPO4	-0.15355	Li3B7O12, NdPO4, Li(CoO2)2, Nd(BO2)3, Co3O4
Li6Eu(BO3)3	LiCoO2	0	--
Li6Eu(BO3)3	Li0.5CoO2	0	--
Li6Eu(BO3)3	LiNiO2	0	--
Li6Eu(BO3)3	Li0.5NiO2	0	--
Li6Eu(BO3)3	LMNO	-0.005205	LiBO2, NiO, EuBO3, Li2MnO3
Li6Eu(BO3)3	MNO	-0.070455	Li2Mn3NiO8, EuBO3, O2, Li3B7O12
Li6Eu(BO3)3	LiCoPO4	-0.045878	Li3PO4, Eu5P3O13, CoO, Co3O4, Co4B6O13
Li6Eu(BO3)3	CoPO4	-0.122042	Co3O4, Li3PO4, Li3B7O12, Li(CoO2)2, EuPO4
Li6Er(BO3)3	LiCoO2	0	--
Li6Er(BO3)3	Li0.5CoO2	-0.002953	Li7Co5O12, Li5Co3O8, Li6B4O9, ErBO3
Li6Er(BO3)3	LiNiO2	0	--
Li6Er(BO3)3	Li0.5NiO2	-0.001665	Li2NiO3, Li6B4O9, NiO, ErBO3
Li6Er(BO3)3	LMNO	-0.011821	NiO, ErBO3, Li2MnO3, LiBO2
Li6Er(BO3)3	MNO	-0.074835	ErBO3, Li3B7O12, Li2Mn3NiO8, O2
Li6Er(BO3)3	LiCoPO4	-0.049904	ErBO3, CoO, Li3PO4, Co4B6O13
Li6Er(BO3)3	CoPO4	-0.128352	Co3O4, ErPO4, Li3PO4, Li(CoO2)2, Li3B7O12
Li2Lu5B3O13	LiCoO2	0	--
Li2Lu5B3O13	Li0.5CoO2	-0.002014	LuBO3, Li7Co5O12, Lu2O3, Li5Co3O8
Li2Lu5B3O13	LiNiO2	0	--
Li2Lu5B3O13	Li0.5NiO2	-0.001169	Li2NiO3, NiO, LuBO3, Lu2O3
Li2Lu5B3O13	LMNO	-0.0074	LuBO3, NiO, Li2MnO3, Lu2O3
Li2Lu5B3O13	MNO	-0.054385	Li2Mn3NiO8, LuBO3, Ni3BO5, Lu2Mn2O7, O2
Li2Lu5B3O13	LiCoPO4	-0.030814	LuBO3, LuPO4, Li3PO4, CoO
Li2Lu5B3O13	CoPO4	-0.12806	Li(CoO2)2, LuPO4, CoO2, Li3B7O12, Co3O4
Li2B6O9F2	LiCoO2	-0.035143	Co3O4, LiF, Li(CoO2)2, Li3B7O12
Li2B6O9F2	Li0.5CoO2	0	--
Li2B6O9F2	LiNiO2	-0.057184	O2, LiF, Ni3BO5, Li3B7O12
Li2B6O9F2	Li0.5NiO2	-0.037085	Ni3BO5, LiF, Li3B7O12, O2
Li2B6O9F2	LMNO	0	--
Li2B6O9F2	MNO	0	--
Li2B6O9F2	LiCoPO4	0	--
Li2B6O9F2	CoPO4	-0.006739	CoO2, BPO4, LiF, Co3O4
Li2B3PO8	LiCoO2	-0.038812	Li3PO4, Li3B7O12, Li(CoO2)2, Co3O4
Li2B3PO8	Li0.5CoO2	0	--
Li2B3PO8	LiNiO2	-0.064319	Li3B7O12, Li3PO4, Ni3BO5, O2
Li2B3PO8	Li0.5NiO2	-0.040825	O2, Li3B7O12, Li3PO4, Ni3BO5
Li2B3PO8	LMNO	-0.000262	Li3PO4, LiNiPO4, Li3B7O12, MnO2
Li2B3PO8	MNO	-0.007354	Ni3(PO4)2, Li3B11O18, MnO2, Li2Mn3NiO8, O2
Li2B3PO8	LiCoPO4	0	--
Li2B3PO8	CoPO4	-0.00678	BPO4, LiCoPO4, CoO2
LiSm6B3O14	LiCoO2	0	--
LiSm6B3O14	Li0.5CoO2	0	--
LiSm6B3O14	LiNiO2	0	--
LiSm6B3O14	Li0.5NiO2	-0.003131	SmBO3, O2, Li2NiO3, SmNiO3
LiSm6B3O14	LMNO	-0.011054	Sm2MnNiO6, Li2MnO3, Sm2Mn2O7, SmBO3
LiSm6B3O14	MNO	-0.048155	O2, Sm2Mn2O7, Li2Mn3NiO8, SmBO3, Sm2MnNiO6
LiSm6B3O14	LiCoPO4	-0.042699	CoO, Li3PO4, SmBO3, SmPO4
LiSm6B3O14	CoPO4	-0.148114	Li3B7O12, Co3O4, SmPO4, Li(CoO2)2, Sm(BO2)3
LiDy6B3O14	LiCoO2	0	--
LiDy6B3O14	Li0.5CoO2	0	--
LiDy6B3O14	LiNiO2	0	--
LiDy6B3O14	Li0.5NiO2	0	--
LiDy6B3O14	LMNO	-0.005659	Dy2Mn2O7, DyBO3, Dy2MnNiO6, Li2MnO3
LiDy6B3O14	MNO	-0.048724	Li2Mn3NiO8, Dy2Mn2O7, DyBO3, Ni3BO5, O2
LiDy6B3O14	LiCoPO4	-0.035363	CoO, DyPO4, Li3PO4, DyBO3
LiDy6B3O14	CoPO4	-0.140167	Li3B7O12, Li(CoO2)2, Dy(BO2)3, DyPO4, Co3O4
LiTm6B3O14	LiCoO2	0	--
LiTm6B3O14	Li0.5CoO2	0	--
LiTm6B3O14	LiNiO2	-0.002988	Tm2O3, NiO, Li6Tm(BO3)3, Li(NiO2)2
LiTm6B3O14	Li0.5NiO2	0	--
LiTm6B3O14	LMNO	0	--
LiTm6B3O14	MNO	-0.048934	O2, Tm2Mn2O7, Li2Mn3NiO8, Ni3BO5, Tm3B5O12
LiTm6B3O14	LiCoPO4	-0.029489	Co4B6O13, CoO, TmPO4, Li3PO4
LiTm6B3O14	CoPO4	-0.135455	Tm(BO2)3, CoO2, Li3B7O12, TmPO4, Co3O4
LiGd6B3O14	LiCoO2	0	--
LiGd6B3O14	Li0.5CoO2	0	--
LiGd6B3O14	LiNiO2	-8.4e-05	Li(NiO2)2, NiO, Gd2O3, Li3Gd(BO3)2
LiGd6B3O14	Li0.5NiO2	0	--
LiGd6B3O14	LMNO	0	--
LiGd6B3O14	MNO	-0.022289	Gd2MnNiO6, Li2Mn3NiO8, O2, GdMn2O5, Gd(BO2)3
LiGd6B3O14	LiCoPO4	-0.029902	Li3PO4, CoO, GdPO4, Co4B6O13
LiGd6B3O14	CoPO4	-0.137778	Li(CoO2)2, GdPO4, Co3O4, Gd(BO2)3
LiB5H2O9	LiCoO2	-0.010131	Li(CoO2)2, Co3O4, Li3B5(HO5)2
LiB5H2O9	Li0.5CoO2	0	--
LiB5H2O9	LiNiO2	-0.02823	H2O, Li(NiO2)2, Li3B5(HO5)2, Ni3BO5
LiB5H2O9	Li0.5NiO2	-0.01198	Ni3BO5, O2, H2O, Li3B5(HO5)2
LiB5H2O9	LMNO	0	--
LiB5H2O9	MNO	0	--
LiB5H2O9	LiCoPO4	0	--
LiB5H2O9	CoPO4	-0.004178	BPO4, LiCoPO4, Co3O4, CoHO2, CoO2
LiB6O9F	LiCoO2	-0.03983	Li3B7O12, LiF, Co3O4, Li(CoO2)2
LiB6O9F	Li0.5CoO2	-0.002426	Co3O4, CoO2, Li3B7O12, Li2B6O9F2
LiB6O9F	LiNiO2	-0.064261	O2, LiF, Li3B7O12, Ni3BO5
LiB6O9F	Li0.5NiO2	-0.041724	Li3B7O12, LiF, O2, Ni3BO5
LiB6O9F	LMNO	0	--
LiB6O9F	MNO	0	--
LiB6O9F	LiCoPO4	-0.000113	Li2B6O9F2, CoB4O7, BPO4, Li3B11O18
LiB6O9F	CoPO4	-0.008307	LiF, CoO2, BPO4, Co3O4
Rb5Li6(BO2)11	LiCoO2	0	--
Rb5Li6(BO2)11	Li0.5CoO2	0	--
Rb5Li6(BO2)11	LiNiO2	0	--
Rb5Li6(BO2)11	Li0.5NiO2	0	--
Rb5Li6(BO2)11	LMNO	-0.002811	Li2MnO3, NiO, RbLiB4O7, Rb2B4O7
Rb5Li6(BO2)11	MNO	-0.051479	Rb5B19O31, O2, Rb2B4O7, Li2Mn3NiO8
Rb5Li6(BO2)11	LiCoPO4	-0.028564	Rb5B19O31, Li3PO4, CoO, Rb2B4O7
Rb5Li6(BO2)11	CoPO4	-0.07652	Li(CoO2)2, RbPO3, Li3PO4, Co3O4, Rb5B19O31
Li2B3O4F3	LiCoO2	-0.043238	LiF, Li3B7O12, Li(CoO2)2, Co3O4
Li2B3O4F3	Li0.5CoO2	-0.000669	LiF, Li2B6O9F2, CoO2, Co3O4
Li2B3O4F3	LiNiO2	-0.072054	O2, LiF, Ni3BO5, Li3B7O12
Li2B3O4F3	Li0.5NiO2	-0.045232	Li3B7O12, LiF, Ni3BO5, O2
Li2B3O4F3	LMNO	0	--
Li2B3O4F3	MNO	-0.001867	Li2B6O9F2, MnO2, NiF2, Li2Mn3NiO8, O2
Li2B3O4F3	LiCoPO4	0	--
Li2B3O4F3	CoPO4	-0.001644	LiF, LiBF4, Co3O4, BPO4, CoO2
LiAlSiO4	LiCoO2	0	--
LiAlSiO4	Li0.5CoO2	0	--
LiAlSiO4	LiNiO2	-0.016828	NiO, Li3AlSiO5, Li(NiO2)2
LiAlSiO4	Li0.5NiO2	0	--
LiAlSiO4	LMNO	0	--
LiAlSiO4	MNO	-0.013072	SiO2, Al2SiO5, Li2Mn3NiO8, O2
LiAlSiO4	LiCoPO4	0	--
LiAlSiO4	CoPO4	-0.053865	Li(CoO2)2, AlPO4, SiO2, Co3O4, Li3PO4
LiAl(Si2O5)2	LiCoO2	-0.003891	LiAlSiO4, Co3O4, Li(CoO2)2, Li2Si2O5
LiAl(Si2O5)2	Li0.5CoO2	0	--
LiAl(Si2O5)2	LiNiO2	-0.031346	Li2SiO3, Ni3O4, LiAlSiO4, Li(NiO2)2
LiAl(Si2O5)2	Li0.5NiO2	0	--
LiAl(Si2O5)2	LMNO	0	--
LiAl(Si2O5)2	MNO	-0.006648	SiO2, Li2Mn3NiO8, O2, Al2SiO5
LiAl(Si2O5)2	LiCoPO4	0	--
LiAl(Si2O5)2	CoPO4	-0.032228	Li(CoO2)2, SiO2, Li3PO4, AlPO4, Co3O4
Li3AlSiO5	LiCoO2	0	--
Li3AlSiO5	Li0.5CoO2	0	--
Li3AlSiO5	LiNiO2	0	--
Li3AlSiO5	Li0.5NiO2	0	--
Li3AlSiO5	LMNO	0	--
Li3AlSiO5	MNO	-0.054985	LiAlSiO4, Li2Mn3NiO8, O2
Li3AlSiO5	LiCoPO4	-0.028791	Li3PO4, Al2CoO4, LiAlSiO4, Li2CoSiO4
Li3AlSiO5	CoPO4	-0.088659	Li(CoO2)2, Li3PO4, SiO2, AlPO4, Co3O4
BaLi2SiO4	LiCoO2	0	--
BaLi2SiO4	Li0.5CoO2	-0.009321	BaSiO3, Li7Co5O12, Li5Co3O8
BaLi2SiO4	LiNiO2	0	--
BaLi2SiO4	Li0.5NiO2	-0.007632	NiO, BaSiO3, Li2NiO3
BaLi2SiO4	LMNO	-0.020093	NiO, BaSiO3, Li2MnO3
BaLi2SiO4	MNO	-0.082194	O2, Li2Mn3NiO8, BaSiO3
BaLi2SiO4	LiCoPO4	-0.067794	Ba3(PO4)2, Li3PO4, Li2CoSiO4
BaLi2SiO4	CoPO4	-0.148984	Li3PO4, Ba2P2O7, Co3O4, Li(CoO2)2, SiO2
Li2BeSiO4	LiCoO2	0	--
Li2BeSiO4	Li0.5CoO2	0	--
Li2BeSiO4	LiNiO2	0	--
Li2BeSiO4	Li0.5NiO2	0	--
Li2BeSiO4	LMNO	0	--
Li2BeSiO4	MNO	-0.037129	SiO2, Be2SiO4, O2, Li2Mn3NiO8
Li2BeSiO4	LiCoPO4	-0.000155	Be2SiO4, Li3PO4, Co2SiO4
Li2BeSiO4	CoPO4	-0.054117	Co3O4, SiO2, Be2SiO4, Li(CoO2)2, Li3PO4
Li2CaSiO4	LiCoO2	0	--
Li2CaSiO4	Li0.5CoO2	-0.005467	Ca2SiO4, Li2SiO3, Li7Co5O12, Li5Co3O8
Li2CaSiO4	LiNiO2	0	--
Li2CaSiO4	Li0.5NiO2	-0.004365	NiO, Li2NiO3, Ca2SiO4, Li2SiO3
Li2CaSiO4	LMNO	-0.012492	Ca2SiO4, NiO, Li2MnO3, Li2SiO3
Li2CaSiO4	MNO	-0.074064	CaSiO3, O2, Li2Mn3NiO8
Li2CaSiO4	LiCoPO4	-0.053009	Ca5Si(PO6)2, Li3PO4, Li2CoSiO4
Li2CaSiO4	CoPO4	-0.132095	SiO2, Li(CoO2)2, Co3O4, Li3PO4, Ca3(PO4)2
Li2CdSiO4	LiCoO2	0	--
Li2CdSiO4	Li0.5CoO2	0	--
Li2CdSiO4	LiNiO2	0	--
Li2CdSiO4	Li0.5NiO2	0	--
Li2CdSiO4	LMNO	0	--
Li2CdSiO4	MNO	-0.045041	O2, Li2Mn3NiO8, CdSiO3
Li2CdSiO4	LiCoPO4	-0.011541	Li3PO4, Cd2SiO4, Li2CoSiO4
Li2CdSiO4	CoPO4	-0.086021	Cd3(PO4)2, Co3O4, Li3PO4, Li(CoO2)2, SiO2
Cs2Li2SiO4	LiCoO2	0	--
Cs2Li2SiO4	Li0.5CoO2	-0.026846	Cs2CoO3, Cs4Si3O8, Li7Co5O12, CsO2
Cs2Li2SiO4	LiNiO2	0	--
Cs2Li2SiO4	Li0.5NiO2	-0.023193	NiO, Cs2SiO3, Li2NiO3
Cs2Li2SiO4	LMNO	-0.034876	NiO, Li2MnO3, Cs2SiO3
Cs2Li2SiO4	MNO	-0.121819	Cs4Li2(Si2O5)3, Cs2MnO4, Li2Mn3NiO8, NiO, Li2SiO3
Cs2Li2SiO4	LiCoPO4	-0.096043	Li3PO4, Li2CoSiO4, Cs3PO4
Cs2Li2SiO4	CoPO4	-0.179231	Cs3PO4, Cs4Li2(Si2O5)3, Li3PO4, CsCoPO4, Li(CoO2)2
Cs4Li2(Si2O5)3	LiCoO2	0	--
Cs4Li2(Si2O5)3	Li0.5CoO2	0	--
Cs4Li2(Si2O5)3	LiNiO2	-0.005692	NiO, Li2SiO3, Cs4Si3O8, Li(NiO2)2
Cs4Li2(Si2O5)3	Li0.5NiO2	0	--
Cs4Li2(Si2O5)3	LMNO	0	--
Cs4Li2(Si2O5)3	MNO	-0.022845	Cs2MnO4, MnNiO3, SiO2, Li2Mn3NiO8
Cs4Li2(Si2O5)3	LiCoPO4	-0.02613	Li3PO4, SiO2, CsCoPO4, Li2CoSiO4
Cs4Li2(Si2O5)3	CoPO4	-0.068299	CsCoPO4, SiO2, Li(CoO2)2, CsPO3, Li3PO4
Li3GaSiO5	LiCoO2	0	--
Li3GaSiO5	Li0.5CoO2	0	--
Li3GaSiO5	LiNiO2	0	--
Li3GaSiO5	Li0.5NiO2	0	--
Li3GaSiO5	LMNO	0	--
Li3GaSiO5	MNO	-0.04999	O2, Li2Mn3NiO8, LiGaSiO4
Li3GaSiO5	LiCoPO4	-0.022692	Ga2CoO4, Li2CoSiO4, LiGaSiO4, Li3PO4
Li3GaSiO5	CoPO4	-0.074154	Co3O4, Li3PO4, Li(CoO2)2, SiO2, GaPO4
LiGaSiO4	LiCoO2	0	--
LiGaSiO4	Li0.5CoO2	0	--
LiGaSiO4	LiNiO2	-0.022612	Li3GaSiO5, NiO, Li(NiO2)2
LiGaSiO4	Li0.5NiO2	0	--
LiGaSiO4	LMNO	0	--
LiGaSiO4	MNO	-0.016761	SiO2, Ga2O3, O2, Li2Mn3NiO8
LiGaSiO4	LiCoPO4	0	--
LiGaSiO4	CoPO4	-0.040186	Co3O4, SiO2, Li(CoO2)2, Li3PO4, GaPO4
LiInSiO4	LiCoO2	0	--
LiInSiO4	Li0.5CoO2	0	--
LiInSiO4	LiNiO2	-0.018062	Li(NiO2)2, NiO, In2O3, Li2SiO3
LiInSiO4	Li0.5NiO2	0	--
LiInSiO4	LMNO	0	--
LiInSiO4	MNO	-0.035366	SiO2, In2O3, O2, Li2Mn3NiO8
LiInSiO4	LiCoPO4	-0.010062	Li2CoSiO4, SiO2, Li3PO4, In2O3
LiInSiO4	CoPO4	-0.055238	Co3O4, Li(CoO2)2, Li3In2(PO4)3, InPO4, SiO2
KLiSi2O5	LiCoO2	0	--
KLiSi2O5	Li0.5CoO2	0	--
KLiSi2O5	LiNiO2	-0.010168	K2SiO3, Li2SiO3, NiO, Li(NiO2)2
KLiSi2O5	Li0.5NiO2	0	--
KLiSi2O5	LMNO	0	--
KLiSi2O5	MNO	-0.029532	O2, Li2Mn3NiO8, K2Si4O9
KLiSi2O5	LiCoPO4	-0.017443	Li3PO4, SiO2, KCoPO4, Li2CoSiO4
KLiSi2O5	CoPO4	-0.063876	SiO2, K3LiP2O7, Li3PO4, KCoPO4, Li(CoO2)2
K3LiSiO4	LiCoO2	0	--
K3LiSiO4	Li0.5CoO2	-0.03621	K(CoO2)2, KLi3SiO4
K3LiSiO4	LiNiO2	0	--
K3LiSiO4	Li0.5NiO2	-0.015349	Li2NiO3, NiO, K6Si2O7
K3LiSiO4	LMNO	-0.022826	NiO, K6Si2O7, Li2MnO3
K3LiSiO4	MNO	-0.102132	K2Si2O5, NiO, Li2Mn3NiO8, K2SiO3, K2MnO4
K3LiSiO4	LiCoPO4	-0.102547	Li2CoSiO4, K3PO4
K3LiSiO4	CoPO4	-0.189453	Co3O4, Li3PO4, K(CoO2)2, K2Si4O9, K3LiP2O7
KLi3SiO4	LiCoO2	0	--
KLi3SiO4	Li0.5CoO2	-0.01577	Li5Co3O8, K(CoO2)2, Li2SiO3, Li7Co5O12
KLi3SiO4	LiNiO2	0	--
KLi3SiO4	Li0.5NiO2	-0.005954	K2SiO3, Li2NiO3, Li2SiO3, NiO
KLi3SiO4	LMNO	-0.017637	NiO, Li2MnO3, Li2SiO3, K2SiO3
KLi3SiO4	MNO	-0.085466	Li2Mn3NiO8, K2MnO4, Li(NiO2)2, KLiSi2O5, O2
KLi3SiO4	LiCoPO4	-0.073897	K3PO4, Li2CoSiO4, Li3PO4
KLi3SiO4	CoPO4	-0.155596	SiO2, Li3PO4, Co3O4, K(CoO2)2, K3LiP2O7
Rb2Li2SiO4	LiCoO2	0	--
Rb2Li2SiO4	Li0.5CoO2	-0.019058	Rb2SiO3, Li5Co3O8, Li7Co5O12
Rb2Li2SiO4	LiNiO2	0	--
Rb2Li2SiO4	Li0.5NiO2	-0.017474	Li2NiO3, Rb2SiO3, NiO
Rb2Li2SiO4	LMNO	-0.029157	Rb2SiO3, Li2MnO3, NiO
Rb2Li2SiO4	MNO	-0.103889	Li2SiO3, Rb2Si2O5, Ni3O4, Li2Mn3NiO8, Rb2MnO4
Rb2Li2SiO4	LiCoPO4	-0.089738	Rb3PO4, Li2CoSiO4, Li3PO4
Rb2Li2SiO4	CoPO4	-0.167605	Co3O4, Rb6Si10O23, Li3PO4, Li(CoO2)2, Rb3PO4
LiScSiO4	LiCoO2	0	--
LiScSiO4	Li0.5CoO2	0	--
LiScSiO4	LiNiO2	-0.009501	Li(NiO2)2, Sc2O3, NiO, Li2SiO3
LiScSiO4	Li0.5NiO2	0	--
LiScSiO4	LMNO	0	--
LiScSiO4	MNO	-0.035854	Sc2Si2O7, O2, Li2Mn3NiO8
LiScSiO4	LiCoPO4	-0.00849	CoO, Sc2Si2O7, Li3PO4
LiScSiO4	CoPO4	-0.074351	Li3Sc2(PO4)3, Co3O4, Li(CoO2)2, ScPO4, SiO2
LiTaSiO5	LiCoO2	0	--
LiTaSiO5	Li0.5CoO2	0	--
LiTaSiO5	LiNiO2	-0.02061	Li2SiO3, NiO, Li(NiO2)2, LiTaO3
LiTaSiO5	Li0.5NiO2	0	--
LiTaSiO5	LMNO	0	--
LiTaSiO5	MNO	-0.010757	O2, Li2Mn3NiO8, Ta2O5, SiO2
LiTaSiO5	LiCoPO4	0	--
LiTaSiO5	CoPO4	-0.047252	TaPO5, Li(CoO2)2, Co3O4, Li3PO4, SiO2
Li2ZnSiO4	LiCoO2	0	--
Li2ZnSiO4	Li0.5CoO2	0	--
Li2ZnSiO4	LiNiO2	0	--
Li2ZnSiO4	Li0.5NiO2	0	--
Li2ZnSiO4	LMNO	0	--
Li2ZnSiO4	MNO	-0.040836	O2, Zn2SiO4, SiO2, Li2Mn3NiO8
Li2ZnSiO4	LiCoPO4	-0.006373	Li2CoSiO4, Zn2SiO4, Li3PO4
Li2ZnSiO4	CoPO4	-0.082103	SiO2, Li(CoO2)2, Li3PO4, Zn5Co19O32, LiZnPO4
RbLi7(SiO4)2	LiCoO2	0	--
RbLi7(SiO4)2	Li0.5CoO2	-0.012449	Li7Co5O12, Rb2SiO3, Li2SiO3, RbO2
RbLi7(SiO4)2	LiNiO2	0	--
RbLi7(SiO4)2	Li0.5NiO2	-0.010731	Li2NiO3, NiO, Rb2SiO3, Li2SiO3
RbLi7(SiO4)2	LMNO	-0.022414	Li2SiO3, Li2MnO3, NiO, Rb2SiO3
RbLi7(SiO4)2	MNO	-0.086425	O2, Li2Mn3NiO8, Rb6Si10O23, Li2SiO3
RbLi7(SiO4)2	LiCoPO4	-0.077181	Rb3PO4, Li3PO4, Li2CoSiO4
RbLi7(SiO4)2	CoPO4	-0.154093	Li3PO4, Li(CoO2)2, Co3O4, SiO2, Rb6Si10O23
NaLi3SiO4	LiCoO2	0	--
NaLi3SiO4	Li0.5CoO2	-0.003294	Li2SiO3, Li7Co5O12, Li5Co3O8, Na2SiO3
NaLi3SiO4	LiNiO2	0	--
NaLi3SiO4	Li0.5NiO2	-0.00171	Li2NiO3, NiO, Li2SiO3, Na2SiO3
NaLi3SiO4	LMNO	-0.013393	NiO, Na2SiO3, Li2SiO3, Li2MnO3
NaLi3SiO4	MNO	-0.078534	Li2Mn3NiO8, O2, Na2Si2O5
NaLi3SiO4	LiCoPO4	-0.067173	NaLi2PO4, Li2CoSiO4
NaLi3SiO4	CoPO4	-0.142316	SiO2, NaLi2PO4, Li(CoO2)2, Co3O4, Li3PO4
LiYSiO4	LiCoO2	0	--
LiYSiO4	Li0.5CoO2	0	--
LiYSiO4	LiNiO2	0	--
LiYSiO4	Li0.5NiO2	0	--
LiYSiO4	LMNO	0	--
LiYSiO4	MNO	-0.041787	O2, Li2Mn3NiO8, Y2Si2O7
LiYSiO4	LiCoPO4	-0.021675	YPO4, Li2CoSiO4
LiYSiO4	CoPO4	-0.108751	Li3PO4, SiO2, YPO4, Co3O4, Li(CoO2)2
Li2TiSiO5	LiCoO2	0	--
Li2TiSiO5	Li0.5CoO2	0	--
Li2TiSiO5	LiNiO2	-0.014843	NiO, Li2TiO3, Li(NiO2)2, Li2SiO3
Li2TiSiO5	Li0.5NiO2	0	--
Li2TiSiO5	LMNO	0	--
Li2TiSiO5	MNO	-0.041424	TiO2, O2, SiO2, Li2Mn3NiO8
Li2TiSiO5	LiCoPO4	-0.014003	Li2CoSiO4, Ti2CoO5, SiO2, Li3PO4
Li2TiSiO5	CoPO4	-0.059858	Li(CoO2)2, TiO2, SiO2, Li3PO4, Co3O4
LiTmSiO4	LiCoO2	0	--
LiTmSiO4	Li0.5CoO2	0	--
LiTmSiO4	LiNiO2	0	--
LiTmSiO4	Li0.5NiO2	0	--
LiTmSiO4	LMNO	0	--
LiTmSiO4	MNO	-0.044878	Tm2Si2O7, O2, Li2Mn3NiO8
LiTmSiO4	LiCoPO4	-0.021335	Li2CoSiO4, TmPO4
LiTmSiO4	CoPO4	-0.108423	Li3PO4, TmPO4, Li(CoO2)2, SiO2, Co3O4
Li2MgSiO4	LiCoO2	0	--
Li2MgSiO4	Li0.5CoO2	0	--
Li2MgSiO4	LiNiO2	0	--
Li2MgSiO4	Li0.5NiO2	0	--
Li2MgSiO4	LMNO	0	--
Li2MgSiO4	MNO	-0.05084	O2, SiO2, Mg2SiO4, Li2Mn3NiO8
Li2MgSiO4	LiCoPO4	-0.02377	Mg2SiO4, Li2CoSiO4, Li3PO4
Li2MgSiO4	CoPO4	-0.099628	SiO2, LiMgPO4, Li(CoO2)2, Li3PO4, Co3O4
SrLi2SiO4	LiCoO2	0	--
SrLi2SiO4	Li0.5CoO2	-0.000963	Li7Co5O12, Li5Co3O8, SrSiO3
SrLi2SiO4	LiNiO2	0	--
SrLi2SiO4	Li0.5NiO2	0	--
SrLi2SiO4	LMNO	-0.011735	NiO, SrSiO3, Li2MnO3
SrLi2SiO4	MNO	-0.075925	SrSiO3, O2, Li2Mn3NiO8
SrLi2SiO4	LiCoPO4	-0.056038	Li2CoSiO4, Sr2CoSi2O7, Li3PO4, CoO
SrLi2SiO4	CoPO4	-0.13515	Sr2P2O7, Li3PO4, Co3O4, Li(CoO2)2, SiO2

## Sheet: Lithium ternary fluorides
coating	cathode	Ed (eV/atom)	PE
LiHF2	LiCoO2	-0.087478	CoHO2, LiF
LiHF2	Li0.5CoO2	-0.031584	CoO2, CoHO2, LiF
LiHF2	LiNiO2	-0.108294	H2O, Ni3O4, O2, LiF
LiHF2	Li0.5NiO2	-0.074982	LiF, Li2NiF4, O2, H2O
LiHF2	LMNO	-0.030255	MnO2, Li2NiF4, LiF, H2O
LiHF2	MNO	-0.027396	O2, MnO2, H2O, Li2NiF4
LiHF2	LiCoPO4	-0.005846	LiF, CoP2(H4O5)2, CoF2, LiCo2P4H3O14
LiHF2	CoPO4	0	--
Li2BeF4	LiCoO2	-0.031145	Co3O4, Li(CoO2)2, BeO, LiF
Li2BeF4	Li0.5CoO2	0	--
Li2BeF4	LiNiO2	-0.057365	Ni3O4, BeO, LiF, O2
Li2BeF4	Li0.5NiO2	-0.020932	O2, Ni3O4, BeO, LiF
Li2BeF4	LMNO	0	--
Li2BeF4	MNO	0	--
Li2BeF4	LiCoPO4	0	--
Li2BeF4	CoPO4	0	--
LiBF4	LiCoO2	-0.0822	Li3B7O12, Co3O4, LiF, Li(CoO2)2
LiBF4	Li0.5CoO2	-0.015811	Co3O4, LiF, Li2B3O4F3, CoO2
LiBF4	LiNiO2	-0.141359	LiF, Ni3BO5, O2, Li3B7O12
LiBF4	Li0.5NiO2	-0.082614	LiF, Ni3BO5, O2, Li2NiF4
LiBF4	LMNO	-0.019621	Li2NiF4, Li2B3O4F3, LiF, MnO2
LiBF4	MNO	-0.015963	Li2B3O4F3, O2, Li2NiF4, MnO2, NiF2
LiBF4	LiCoPO4	0	--
LiBF4	CoPO4	0	--
Li3AlF6	LiCoO2	-0.024643	Co3O4, LiAl5O8, LiF, Li(CoO2)2
Li3AlF6	Li0.5CoO2	0	--
Li3AlF6	LiNiO2	-0.051488	LiAl5O8, LiF, Ni3O4, Li(NiO2)2
Li3AlF6	Li0.5NiO2	-0.015336	Ni3O4, LiF, LiAl5O8, O2
Li3AlF6	LMNO	0	--
Li3AlF6	MNO	0	--
Li3AlF6	LiCoPO4	0	--
Li3AlF6	CoPO4	0	--
Li2SiF6	LiCoO2	-0.077498	SiO2, LiF, Co3O4, Li(CoO2)2
Li2SiF6	Li0.5CoO2	-0.013119	SiO2, Co3O4, LiF, CoO2
Li2SiF6	LiNiO2	-0.116378	SiO2, LiF, Ni3O4, O2
Li2SiF6	Li0.5NiO2	-0.071971	Li2NiF4, NiF2, O2, SiO2
Li2SiF6	LMNO	-0.015291	Li2NiF4, MnO2, SiO2, LiF
Li2SiF6	MNO	-0.014408	SiO2, MnO2, O2, NiF2, Li2NiF4
Li2SiF6	LiCoPO4	0	--
Li2SiF6	CoPO4	0	--
LiPF6	LiCoO2	-0.146137	CoPO4, LiF, CoF2, CoO2
LiPF6	Li0.5CoO2	-0.077311	CoPO4, O2, LiCoF4, LiF
LiPF6	LiNiO2	-0.250276	Li2NiF4, O2, Li2NiPO4F, Ni3(PO4)2
LiPF6	Li0.5NiO2	-0.193892	O2, NiF2, Ni3(PO4)2, Li2NiF4
LiPF6	LMNO	-0.092699	O2, LiMnP2O7, LiMnF4, NiF2, Li2MnF5
LiPF6	MNO	-0.077251	O2, MnP2O7, LiMnF4, MnF3, NiF2
LiPF6	LiCoPO4	-0.017767	CoF2, Co(PO3)2, LiF
LiPF6	CoPO4	0	--
Li2TiF6	LiCoO2	-0.062985	Li(CoO2)2, TiO2, Co3O4, LiF
Li2TiF6	Li0.5CoO2	-0.001745	CoO2, LiF, Co3O4, TiO2
Li2TiF6	LiNiO2	-0.099543	LiF, O2, TiO2, Ni3O4
Li2TiF6	Li0.5NiO2	-0.044507	O2, LiF, TiO2, Ni3O4
Li2TiF6	LMNO	0	--
Li2TiF6	MNO	-0.002	TiO2, Li2Mn3NiO8, NiF2, MnO2, O2
Li2TiF6	LiCoPO4	0	--
Li2TiF6	CoPO4	0	--
LiVF6	LiCoO2	-0.115767	Co3O4, CoO2, V2O5, LiF
LiVF6	Li0.5CoO2	-0.035759	LiF, V2O5, CoF2, CoO2
LiVF6	LiNiO2	-0.195367	LiF, O2, Li2NiF4, V2Ni3O8
LiVF6	Li0.5NiO2	-0.143385	Li2NiF4, O2, V2NiO6, NiF2
LiVF6	LMNO	-0.052301	V2O5, MnO2, O2, Li2MnF5, Li2NiF4
LiVF6	MNO	-0.0398	NiF2, V2O5, LiMnF4, O2, MnO2
LiVF6	LiCoPO4	-0.025809	CoPO4, Li2VF6
LiVF6	CoPO4	0	--
Li3GaF6	LiCoO2	-0.053565	LiF, LiGa5O8, Co3O4, Li(CoO2)2
Li3GaF6	Li0.5CoO2	-0.000372	LiF, CoO2, Co3O4, Ga2O3
Li3GaF6	LiNiO2	-0.088439	LiF, Ni3O4, Ga2NiO4, O2
Li3GaF6	Li0.5NiO2	-0.042397	O2, LiF, Ni3O4, Ga2NiO4
Li3GaF6	LMNO	0	--
Li3GaF6	MNO	-0.00295	Li2NiF4, Ga2NiO4, O2, MnO2
Li3GaF6	LiCoPO4	0	--
Li3GaF6	CoPO4	0	--
Li2GeF6	LiCoO2	-0.075164	GeO2, Li(CoO2)2, LiF, Co3O4
Li2GeF6	Li0.5CoO2	-0.01129	GeO2, CoO2, Co3O4, LiF
Li2GeF6	LiNiO2	-0.130241	LiF, Ni3O4, Ni2GeO4, O2
Li2GeF6	Li0.5NiO2	-0.08224	Ni2GeO4, LiF, O2, Li2NiF4
Li2GeF6	LMNO	-0.012348	Li2NiF4, LiF, MnO2, GeO2
Li2GeF6	MNO	-0.012357	Li2NiF4, MnO2, GeO2, NiF2, O2
Li2GeF6	LiCoPO4	0	--
Li2GeF6	CoPO4	0	--
LiAsF6	LiCoO2	-0.111777	CoO2, LiF, Co3O4, Co(AsO3)2
LiAsF6	Li0.5CoO2	-0.031808	Co(AsO3)2, CoO2, LiF, Co3O4
LiAsF6	LiNiO2	-0.1954	Li2NiF4, LiF, Ni3(AsO4)2, O2
LiAsF6	Li0.5NiO2	-0.141971	NiF2, Li2NiF4, Ni3(AsO4)2, O2
LiAsF6	LMNO	-0.0449	LiF, MnO2, Li2NiF4, Ni(AsO3)2
LiAsF6	MNO	-0.033081	Li2NiF4, NiF2, Ni(AsO3)2, MnO2, O2
LiAsF6	LiCoPO4	0	--
LiAsF6	CoPO4	0	--
LiYF4	LiCoO2	-0.000128	LiF, Li(CoO2)2, Co3O4, YOF
LiYF4	Li0.5CoO2	0	--
LiYF4	LiNiO2	-0.027392	LiF, Li(NiO2)2, Ni3O4, YOF
LiYF4	Li0.5NiO2	0	--
LiYF4	LMNO	0	--
LiYF4	MNO	0	--
LiYF4	LiCoPO4	0	--
LiYF4	CoPO4	0	--
Li3Zr4F19	LiCoO2	-0.062858	LiF, Li(CoO2)2, ZrO2, Co3O4
Li3Zr4F19	Li0.5CoO2	-0.014059	ZrO2, CoO2, Li2ZrF6, Co3O4
Li3Zr4F19	LiNiO2	-0.103455	Ni3O4, ZrO2, O2, LiF
Li3Zr4F19	Li0.5NiO2	-0.043071	O2, LiF, Ni3O4, ZrO2
Li3Zr4F19	LMNO	-0.009599	MnO2, ZrO2, Li2ZrF6, ZrNiF6
Li3Zr4F19	MNO	-0.006474	ZrO2, ZrNiF6, Li2ZrF6, O2, MnO2
Li3Zr4F19	LiCoPO4	-0.013741	LiZr2(PO4)3, Co3(PO4)2, Li2ZrF6
Li3Zr4F19	CoPO4	0	--
Li2ZrF6	LiCoO2	-0.049013	Co3O4, ZrO2, LiF, Li(CoO2)2
Li2ZrF6	Li0.5CoO2	0	--
Li2ZrF6	LiNiO2	-0.083336	LiF, O2, Ni3O4, ZrO2
Li2ZrF6	Li0.5NiO2	-0.033556	ZrO2, O2, Ni3O4, LiF
Li2ZrF6	LMNO	0	--
Li2ZrF6	MNO	0	--
Li2ZrF6	LiCoPO4	0	--
Li2ZrF6	CoPO4	0	--
Li4ZrF8	LiCoO2	-0.042152	ZrO2, Li(CoO2)2, LiF, Co3O4
Li4ZrF8	Li0.5CoO2	0	--
Li4ZrF8	LiNiO2	-0.070794	LiF, O2, Ni3O4, ZrO2
Li4ZrF8	Li0.5NiO2	-0.029542	O2, LiF, Ni3O4, ZrO2
Li4ZrF8	LMNO	0	--
Li4ZrF8	MNO	-0.002549	Li2Mn3NiO8, Li2ZrF6, O2, Li2NiF4, MnO2
Li4ZrF8	LiCoPO4	0	--
Li4ZrF8	CoPO4	0	--
LiNbF6	LiCoO2	-0.090485	LiF, Nb2O5, CoO2, Co3O4
LiNbF6	Li0.5CoO2	-0.017943	Co3O4, Nb2O5, CoO2, LiF
LiNbF6	LiNiO2	-0.139313	Ni3O4, O2, Nb2O5, Li2NiF4
LiNbF6	Li0.5NiO2	-0.095331	Li2NiF4, O2, NiF2, Nb2O5
LiNbF6	LMNO	-0.023702	Li2NiF4, LiF, Nb2O5, MnO2
LiNbF6	MNO	-0.018706	MnO2, NiF2, Nb2O5, Li2NiF4, O2
LiNbF6	LiCoPO4	0	--
LiNbF6	CoPO4	0	--
Li2PdF6	LiCoO2	-0.147463	CoF2, CoO2, PdO2, LiF
Li2PdF6	Li0.5CoO2	-0.102253	LiF, LiCoF4, O2, PdO2
Li2PdF6	LiNiO2	-0.229	Li2NiF4, O2, PdO2, LiF
Li2PdF6	Li0.5NiO2	-0.193255	PdO2, Li2NiF4, O2, NiF2
Li2PdF6	LMNO	-0.124362	Li2MnF5, PdO2, O2, Li2NiF4, LiF
Li2PdF6	MNO	-0.117751	LiMnF4, Li2MnF5, O2, PdO2, NiF2
Li2PdF6	LiCoPO4	-0.066095	PdO2, CoF2, LiPF6, LiF
Li2PdF6	CoPO4	-0.059234	PdO2, LiF, LiPF6, LiCoF4
LiAgF4	LiCoO2	-0.174257	LiCoF4, Ag3O4, LiF, CoO2
LiAgF4	Li0.5CoO2	-0.131386	Ag3O4, O2, LiF, LiCoF4
LiAgF4	LiNiO2	-0.264725	Li2NiF4, Ag3O4, LiF, O2
LiAgF4	Li0.5NiO2	-0.224073	NiF2, Ag3O4, O2, Li2NiF4
LiAgF4	LMNO	-0.153221	Li2MnF5, O2, NiF2, Li2NiF4, Ag3O4
LiAgF4	MNO	-0.145145	Ag3O4, Li2MnF5, NiF2, O2, LiMnF4
LiAgF4	LiCoPO4	-0.10143	LiPF6, LiCoF4, LiF, Ag3O4
LiAgF4	CoPO4	-0.087104	Ag3O4, LiCoF4, LiPF6, O2, LiF
LiInF4	LiCoO2	-0.067047	In2O3, Co3O4, LiF, Li(CoO2)2
LiInF4	Li0.5CoO2	-0.003203	Co3O4, In2O3, CoO2, LiF
LiInF4	LiNiO2	-0.105805	LiF, Ni3O4, O2, In2O3
LiInF4	Li0.5NiO2	-0.049666	In2O3, Ni3O4, O2, Li2NiF4
LiInF4	LMNO	-0.003624	LiF, Mn2In2O7, Li2NiF4, MnO2
LiInF4	MNO	-0.005689	O2, Li2NiF4, MnO2, NiF2, Mn2In2O7
LiInF4	LiCoPO4	0	--
LiInF4	CoPO4	0	--
Li2SnF6	LiCoO2	-0.074549	SnO2, Co3O4, Li(CoO2)2, LiF
Li2SnF6	Li0.5CoO2	-0.010808	Co3O4, SnO2, LiF, CoO2
Li2SnF6	LiNiO2	-0.112957	LiF, Ni3O4, SnO2, O2
Li2SnF6	Li0.5NiO2	-0.066114	NiF2, O2, SnO2, Li2NiF4
Li2SnF6	LMNO	-0.011573	Li2NiF4, SnO2, LiF, MnO2
Li2SnF6	MNO	-0.011817	SnO2, Li2NiF4, NiF2, MnO2, O2
Li2SnF6	LiCoPO4	0	--
Li2SnF6	CoPO4	0	--
LiSbF6	LiCoO2	-0.092369	LiF, CoO2, Co(SbO3)2, Co3O4
LiSbF6	Li0.5CoO2	-0.01917	Co3O4, Co(SbO3)2, LiF, CoO2
LiSbF6	LiNiO2	-0.157373	Ni(SbO3)2, Li2NiF4, O2
LiSbF6	Li0.5NiO2	-0.109424	Ni(SbO3)2, NiF2, O2, Li2NiF4
LiSbF6	LMNO	-0.026832	Ni(SbO3)2, MnO2, Li2NiF4, LiF
LiSbF6	MNO	-0.021173	NiF2, Li2NiF4, MnO2, O2, Ni(SbO3)2
LiSbF6	LiCoPO4	0	--
LiSbF6	CoPO4	0	--
CsLiF2	LiCoO2	0	--
CsLiF2	Li0.5CoO2	0	--
CsLiF2	LiNiO2	0	--
CsLiF2	Li0.5NiO2	0	--
CsLiF2	LMNO	0	--
CsLiF2	MNO	-0.027888	Li2Mn3NiO8, O2, Cs4Ni3F10, CsMnO4, Cs2MnF6
CsLiF2	LiCoPO4	-0.04088	CsCoPO4, LiF
CsLiF2	CoPO4	-0.033806	Cs2PO3F, CoO2, Cs7Co4F15, LiF
LiCeF5	LiCoO2	-0.068502	Co3O4, Li(CoO2)2, CeO2, LiF
LiCeF5	Li0.5CoO2	-0.002501	CoO2, LiF, CeO2, Co3O4
LiCeF5	LiNiO2	-0.109199	CeO2, Ni3O4, O2, LiF
LiCeF5	Li0.5NiO2	-0.050595	O2, Li2NiF4, CeO2, Ni3O4
LiCeF5	LMNO	0	--
LiCeF5	MNO	-0.001747	MnO2, O2, CeO2, NiF2, Li2Mn3NiO8
LiCeF5	LiCoPO4	0	--
LiCeF5	CoPO4	0	--
LiLuF4	LiCoO2	-0.007075	LuOF, Co3O4, Li(CoO2)2, LiF
LiLuF4	Li0.5CoO2	0	--
LiLuF4	LiNiO2	-0.034339	LuOF, Ni3O4, LiF, Li(NiO2)2
LiLuF4	Li0.5NiO2	-0.001165	Ni3O4, O2, LuOF, LiF
LiLuF4	LMNO	0	--
LiLuF4	MNO	0	--
LiLuF4	LiCoPO4	0	--
LiLuF4	CoPO4	0	--
LiTaF6	LiCoO2	-0.078604	Li(CoO2)2, Li2Ta2(OF2)3, LiF, Co3O4
LiTaF6	Li0.5CoO2	-0.016772	Co3O4, Li2Ta2(OF2)3, LiF, CoO2
LiTaF6	LiNiO2	-0.119851	O2, Ni3O4, LiF, Ta2NiO6
LiTaF6	Li0.5NiO2	-0.070665	Li2NiF4, NiF2, O2, Li2Ta2(OF2)3
LiTaF6	LMNO	-0.02087	MnO2, Li2NiF4, Li2Ta2(OF2)3
LiTaF6	MNO	-0.016563	MnO2, NiF2, Li2Ta2(OF2)3, O2
LiTaF6	LiCoPO4	0	--
LiTaF6	CoPO4	0	--
LiAuF6	LiCoO2	-0.284183	Au2O3, LiF, LiCoF4, O2
LiAuF6	Li0.5CoO2	-0.235321	LiF, O2, LiCoF4, Au2O3
LiAuF6	LiNiO2	-0.373568	NiF2, Li2NiF4, Au2O3, O2
LiAuF6	Li0.5NiO2	-0.325077	Au2O3, NiF2, Li2NiF4, O2
LiAuF6	LMNO	-0.258761	Au2O3, Li2MnF6, NiF2, LiMnF4, O2
LiAuF6	MNO	-0.240934	O2, NiF2, LiMnF4, Au2O3, MnF3
LiAuF6	LiCoPO4	-0.210039	Au2O3, O2, LiCoF4, LiF, LiPF6
LiAuF6	CoPO4	-0.186361	Au2O3, LiPF6, LiCoF4, CoF2, O2
LiBiF6	LiCoO2	-0.180916	O2, LiBiF4, LiCoF4
LiBiF6	Li0.5CoO2	-0.151535	LiBiF4, BiF3, LiCoF4, O2
LiBiF6	LiNiO2	-0.235324	Li2NiF4, NiF2, LiBiF4, O2
LiBiF6	Li0.5NiO2	-0.210092	NiF2, O2, LiBiF4, Li2NiF4
LiBiF6	LMNO	-0.164306	O2, BiF3, LiBiF4, LiMnF4, NiF2
LiBiF6	MNO	-0.155511	BiF3, O2, LiMnF4, LiBiF4, NiF2
LiBiF6	LiCoPO4	-0.135979	BiF3, O2, LiCoF4, LiBiF4, LiPF6
LiBiF6	CoPO4	-0.123822	O2, LiBiF4, BiF3, LiPF6, LiCoF4
